# Supplementary material for: Divergence of Fecal Microbiota and Their Associations With Host Phylogeny in Cervinae
Source: Front Microbiol. 2018 Aug 30;9:1823. doi: 10.3389/fmicb.2018.01823 (PMC6125396; doi:10.3389/fmicb.2018.01823)
Supplement: TABLE S1 — Component of fodder. [file Table_1.XLSX]

## Sheet: Table S1
Table S1 Component of fodder.
Raw material:Corn flour, hulling soybean meal, wheat bran, alfalfa meal, dried beet pulp, powder of locust tree leaves, soybean oil, salt, calcium hydrogen phosphate, L lysine, ferrous sulfate, copper sulfate, manganese sulfate, zinc sulfate, sodium selenite, calcium iodate, vitamin A, vitamin D3, vitamin E, vitamin k, vitamin c, vitamin B1, vitamin B2, pantothenic acid, niacin, biotin, folic aci…
	Ingredient	Content
Nutritional ingredient	Metabolic energy	2800kcal/kg
	Crude protein	0.12
	Crude fat	≥3.5 %
	Crude ash	0.1
	Crude fibre	0.085
	Linoleic acid	0.016
Minerals	Calcium	0.01
	Phosphorus	0.005
	Sodium	0.0024
	Ferrum	340ppm
	Copper	15ppm
	Manganese	98ppm
	Zinc	100ppm
Vitamin	Vitamin A	9800IU/kg
	Vitamin D3	1900IU/kg
	Vitamin E	150 IU/kg
	Vitamin K	3.6ppm
	Vitamin B1	9ppm
	Vitamin B2	8.5ppm
	Pantothenic acid	3ppm
	Niacin	20ppm
	Biotin	0.17ppm
	Folic acid	1.2ppm
	Choline	820ppm
	Vitamin B6	7.5ppm
	Vitamin B12	29.9μg/kg
Amino acid	Lysine	0.007
	Methionine	0.0016
	Cystine	0.004
	Threonine	0.0045
	Tryptophan	0.0017

## Sheet: Table S2
Table S2 Intraspecies core microbiota in Cervinae.
Species	C.nippon		C.elaphus		R.unicolor		Elaphu.davidianus		D.dama		A.porcinus		Elapho.cephalophus
Numbers of core OTUs	536		574		765		531		648		187		180
Numbers of host specific core OTUs	73		94		195		158		119		33		43
Host specific core OTUs	OTU ID	Taxonomy	OTU ID	Taxonomy	OTU ID	Taxonomy	OTU ID	Taxonomy	OTU ID	Taxonomy	OTU ID	Taxonomy	OTU ID	Taxonomy
	OTU10333	p__Firmicutes;c__Clostridia;o__Clostridiales;f__Veillonellaceae;g__Phascolarctobacterium;s__	OUT3217	p__Firmicutes;c__Clostridia;o__Clostridiales;f__Clostridiaceae;g__Clostridium;s__	OTU10022	p__Firmicutes;c__Clostridia;o__Clostridiales;f__Veillonellaceae;g__Phascolarctobacterium;s__	OTU12523	p__Firmicutes;c__Clostridia;o__Clostridiales;f__Veillonellaceae;g__Phascolarctobacterium;s__	OTU17168	p__Firmicutes;c__Erysipelotrichi;o__Erysipelotrichales;f__Erysipelotrichaceae;g__Sharpea;s__azabuensis	OTU114	p__Proteobacteria;c__Gammaproteobacteria;o__Aeromonadales;f__Succinivibrionaceae;g__Succinivibrio;s__	OTU11737	p__Firmicutes;c__Clostridia;o__Clostridiales;f__Ruminococcaceae;g__Ruminococcus;s__
	OTU17247	p__Spirochaetes;c__Spirochaetes;o__Spirochaetales;f__Spirochaetaceae;g__Treponema;s__	OUT23143	p__Bacteroidetes;c__Bacteroidia;o__Bacteroidales;f__Bacteroidaceae;g__5-7N15;s__	OTU4848	p__Bacteroidetes;c__Bacteroidia;o__Bacteroidales;f__S24-7;g__;s__	OTU12548	p__Firmicutes;c__Clostridia;o__Clostridiales;f__Ruminococcaceae;g__;s__	OTU1589	p__Firmicutes;c__Clostridia;o__Clostridiales	OTU16949	p__Proteobacteria;c__Gammaproteobacteria;o__Aeromonadales;f__Succinivibrionaceae;g__Succinivibrio;s__	OTU14852	p__Firmicutes;c__Clostridia;o__Clostridiales;f__Ruminococcaceae;g__;s__
	OTU37	p__Spirochaetes;c__Spirochaetes;o__Spirochaetales;f__Spirochaetaceae;g__Treponema;s__	OUT24386	p__Bacteroidetes;c__Bacteroidia;o__Bacteroidales	OTU3996	p__Bacteroidetes;c__Bacteroidia;o__Bacteroidales;f__S24-7;g__;s__	OTU19786	p__Firmicutes;c__Clostridia;o__Clostridiales;f__Ruminococcaceae;g__;s__	OTU3032	p__Firmicutes;c__Clostridia;o__Clostridiales;f__Ruminococcaceae;g__;s__	OTU7943	p__Bacteroidetes;c__Bacteroidia;o__Bacteroidales;f__S24-7;g__;s__	OTU16939	p__Firmicutes;c__Clostridia;o__Clostridiales;f__Ruminococcaceae;g__;s__
	OTU6118	p__Spirochaetes;c__Spirochaetes;o__Spirochaetales;f__Spirochaetaceae;g__Treponema;s__	OUT1639	p__Verrucomicrobia;c__Verrucomicrobiae;o__Verrucomicrobiales;f__Verrucomicrobiaceae;g__Akkermansia;s__	OTU9977	p__Firmicutes;c__Clostridia;o__Clostridiales;f__Ruminococcaceae;g__;s__	OTU20944	p__Firmicutes;c__Clostridia;o__Clostridiales;f__Ruminococcaceae;g__;s__	OTU5835	p__Spirochaetes;c__Spirochaetes;o__Spirochaetales;f__Spirochaetaceae;g__Treponema;s__	OTU13916	p__Firmicutes;c__Clostridia;o__Clostridiales;f__Ruminococcaceae;g__Ruminococcus	OTU7437	p__Firmicutes;c__Clostridia;o__Clostridiales;f__Ruminococcaceae
	OTU22673	p__Spirochaetes;c__Spirochaetes;o__Spirochaetales;f__Spirochaetaceae;g__Treponema;s__	OUT11420	p__Firmicutes;c__Clostridia;o__Clostridiales;f__Ruminococcaceae;g__;s__	OTU5433	p__Firmicutes;c__Clostridia;o__Clostridiales;f__Ruminococcaceae;g__;s__	OTU12507	p__Firmicutes;c__Clostridia;o__Clostridiales;f__Ruminococcaceae;g__;s__	OTU19757	p__Bacteroidetes;c__Bacteroidia;o__Bacteroidales;f__Rikenellaceae;g__;s__	OTU16927	p__Firmicutes;c__Clostridia;o__Clostridiales;f__Ruminococcaceae;g__;s__	OTU14829	p__Firmicutes;c__Clostridia;o__Clostridiales;f__Ruminococcaceae
	OTU18660	p__Spirochaetes;c__Spirochaetes;o__Spirochaetales;f__Spirochaetaceae;g__Treponema;s__	OUT22260	p__Bacteroidetes;c__Bacteroidia;o__Bacteroidales;f__Bacteroidaceae;g__;s__	OTU18586	p__Firmicutes;c__Clostridia;o__Clostridiales;f__Ruminococcaceae;g__;s__	OTU9408	p__Firmicutes;c__Clostridia;o__Clostridiales;f__Ruminococcaceae;g__Ruminococcus;s__	OTU8995	p__Firmicutes;c__Clostridia;o__Clostridiales;f__Ruminococcaceae;g__;s__	OTU9175	p__Firmicutes;c__Clostridia;o__Clostridiales;f__Ruminococcaceae;g__Ruminococcus;s__	OTU7492	p__Firmicutes;c__Clostridia;o__Clostridiales;f__Ruminococcaceae
	OTU20913	p__Spirochaetes;c__Spirochaetes;o__Spirochaetales;f__Spirochaetaceae;g__Treponema;s__	OUT5168	p__Firmicutes;c__Clostridia;o__Clostridiales;f__Ruminococcaceae	OTU4636	p__Firmicutes;c__Clostridia;o__Clostridiales;f__Ruminococcaceae;g__;s__	OTU15416	p__Firmicutes;c__Clostridia;o__Clostridiales;f__Ruminococcaceae;g__;s__	OTU23192	p__Bacteroidetes;c__Bacteroidia;o__Bacteroidales;f__;g__;s__	OTU9172	p__Firmicutes;c__Clostridia;o__Clostridiales;f__Ruminococcaceae;g__;s__	OTU8883	p__Firmicutes;c__Clostridia;o__Clostridiales;f__Ruminococcaceae
	OTU9833	p__Bacteroidetes;c__Bacteroidia;o__Bacteroidales;f__S24-7;g__;s__	OUT6269	p__Firmicutes;c__Clostridia;o__Clostridiales;f__Lachnospiraceae;g__;s__	OTU8618	p__Firmicutes;c__Clostridia;o__Clostridiales;f__Ruminococcaceae;g__;s__	OTU10731	p__Firmicutes;c__Clostridia;o__Clostridiales;f__Ruminococcaceae;g__Oscillospira	OTU3947	p__Firmicutes;c__Clostridia;o__Clostridiales;f__;g__;s__	OTU5495	p__Firmicutes;c__Clostridia;o__Clostridiales;f__Ruminococcaceae;g__;s__	OTU14925	p__Firmicutes;c__Clostridia;o__Clostridiales;f__Ruminococcaceae
	OTU11122	p__Bacteroidetes;c__Bacteroidia;o__Bacteroidales;f__S24-7;g__;s__	OUT1822	p__Firmicutes;c__Clostridia;o__Clostridiales;f__Ruminococcaceae;g__Ruminococcus	OTU6021	p__Firmicutes;c__Clostridia;o__Clostridiales;f__Ruminococcaceae;g__;s__	OTU7245	p__Firmicutes;c__Clostridia;o__Clostridiales;f__Ruminococcaceae;g__Oscillospira;s__	OTU1735	p__Firmicutes;c__Clostridia;o__Clostridiales;f__Clostridiaceae;g__Clostridium;s__	OTU9060	p__Firmicutes;c__Clostridia;o__Clostridiales;f__Ruminococcaceae	OTU1517	p__Firmicutes;c__Bacilli;o__Bacillales;f__Planococcaceae;g__Sporosarcina;s__ginsengi
	OTU7175	p__Bacteroidetes;c__Bacteroidia;o__Bacteroidales;f__S24-7;g__;s__	OUT2356	p__Firmicutes;c__Clostridia;o__Clostridiales;f__Ruminococcaceae;g__;s__	OTU3921	p__Firmicutes;c__Clostridia;o__Clostridiales;f__Ruminococcaceae;g__Papillibacter;s__cinnamivorans	OTU15425	p__Firmicutes;c__Clostridia;o__Clostridiales;f__Ruminococcaceae;g__;s__	OTU7072	p__Firmicutes;c__Clostridia;o__Clostridiales;f__Ruminococcaceae;g__Ruminococcus	OTU24813	p__Bacteroidetes;c__Bacteroidia;o__Bacteroidales;f__Rikenellaceae;g__;s__	OTU2188	p__Firmicutes;c__Bacilli;o__Bacillales;f__Planococcaceae;g__Solibacillus;s__
	OTU18393	p__Firmicutes;c__Clostridia;o__Clostridiales;f__Ruminococcaceae;g__;s__	OUT8879	p__Firmicutes;c__Clostridia;o__Clostridiales;f__Ruminococcaceae;g__Oscillospira	OTU18808	p__Firmicutes;c__Clostridia;o__Clostridiales;f__Ruminococcaceae;g__;s__	OTU10229	p__Firmicutes;c__Clostridia;o__Clostridiales;f__Ruminococcaceae;g__Oscillospira;s__	OTU16689	p__Tenericutes;c__Mollicutes;o__RF39;f__;g__;s__	OTU2179	p__Firmicutes;c__Clostridia;o__Clostridiales;f__Lachnospiraceae;g__;s__	OTU2274	p__Firmicutes;c__Bacilli;o__Bacillales;f__Planococcaceae;g__Solibacillus;s__
	OTU3405	p__Firmicutes;c__Clostridia;o__Clostridiales;f__Ruminococcaceae;g__;s__	OUT14497	p__Firmicutes;c__Clostridia;o__Clostridiales;f__Ruminococcaceae;g__;s__	OTU16876	p__Firmicutes;c__Clostridia;o__Clostridiales;f__Ruminococcaceae;g__;s__	OTU10786	p__Firmicutes;c__Clostridia;o__Clostridiales;f__Ruminococcaceae;g__;s__	OTU25999	p__Bacteroidetes;c__Bacteroidia;o__Bacteroidales;f__Bacteroidaceae;g__;s__	OTU7341	p__Firmicutes;c__Clostridia;o__Clostridiales;f__Lachnospiraceae;g__;s__	OTU2928	p__Firmicutes;c__Bacilli;o__Bacillales;f__Planococcaceae;g__Lysinibacillus
	OTU6649	p__Firmicutes;c__Clostridia;o__Clostridiales;f__Ruminococcaceae;g__;s__	OUT1692	p__Actinobacteria;c__Actinobacteria;o__Bifidobacteriales;f__Bifidobacteriaceae;g__Bifidobacterium;s__pseudolongum	OTU20756	p__Firmicutes;c__Clostridia;o__Clostridiales;f__Ruminococcaceae;g__;s__	OTU12703	p__Firmicutes;c__Clostridia;o__Clostridiales;f__Ruminococcaceae;g__;s__	OTU18728	p__Firmicutes;c__Clostridia;o__Clostridiales	OTU5970	p__Firmicutes;c__Clostridia;o__Clostridiales;f__Lachnospiraceae;g__Coprococcus;s__	OTU3098	p__Firmicutes;c__Bacilli;o__Bacillales;f__Planococcaceae
	OTU6733	p__Firmicutes;c__Clostridia;o__Clostridiales;f__Ruminococcaceae;g__Oscillospira	OUT22298	p__Bacteroidetes;c__Bacteroidia;o__Bacteroidales;f__Bacteroidaceae;g__5-7N15;s__	OTU17552	p__Firmicutes;c__Clostridia;o__Clostridiales;f__Ruminococcaceae;g__;s__	OTU16901	p__Firmicutes;c__Clostridia;o__Clostridiales;f__Ruminococcaceae;g__;s__	OTU1532	p__Firmicutes;c__Clostridia;o__Clostridiales;f__;g__;s__	OTU7352	p__Firmicutes;c__Clostridia;o__Clostridiales;f__Lachnospiraceae;g__;s__	OTU2193	p__Firmicutes;c__Bacilli;o__Bacillales;f__Planococcaceae
	OTU17169	p__Firmicutes;c__Clostridia;o__Clostridiales;f__Ruminococcaceae;g__;s__	OUT6795	Unclassified bacteria	OTU18355	p__Firmicutes;c__Clostridia;o__Clostridiales;f__Ruminococcaceae;g__;s__	OTU19079	p__Firmicutes;c__Clostridia;o__Clostridiales;f__Ruminococcaceae;g__;s__	OTU18553	p__Spirochaetes;c__Spirochaetes;o__Spirochaetales;f__Spirochaetaceae;g__Treponema;s__	OTU8567	p__Firmicutes;c__Clostridia;o__Clostridiales;f__Lachnospiraceae;g__Dorea;s__	OTU2316	p__Firmicutes;c__Bacilli;o__Bacillales;f__Planococcaceae
	OTU7012	p__Firmicutes;c__Clostridia;o__Clostridiales;f__Ruminococcaceae;g__;s__	OUT5575	p__Firmicutes;c__Clostridia;o__Clostridiales;f__;g__;s__	OTU7798	p__Firmicutes;c__Clostridia;o__Clostridiales;f__Ruminococcaceae;g__;s__	OTU19179	p__Firmicutes;c__Clostridia;o__Clostridiales;f__Ruminococcaceae;g__;s__	OTU7000	p__Firmicutes;c__Clostridia;o__Clostridiales;f__Lachnospiraceae;g__;s__	OTU7891	p__Firmicutes;c__Clostridia;o__Clostridiales;f__Lachnospiraceae;g__;s__	OTU2347	p__Firmicutes;c__Bacilli;o__Bacillales;f__Planococcaceae
	OTU7813	p__Firmicutes;c__Clostridia;o__Clostridiales;f__Ruminococcaceae;g__;s__	OUT26510	p__Bacteroidetes;c__Bacteroidia;o__Bacteroidales;f__Rikenellaceae;g__;s__	OTU10301	p__Firmicutes;c__Clostridia;o__Clostridiales;f__Ruminococcaceae;g__;s__	OTU7881	p__Firmicutes;c__Clostridia;o__Clostridiales;f__Ruminococcaceae;g__;s__	OTU3747	p__Firmicutes;c__Clostridia;o__Clostridiales;f__Ruminococcaceae	OTU7902	p__Firmicutes;c__Clostridia;o__Clostridiales;f__Lachnospiraceae	OTU1500	p__Actinobacteria;c__Actinobacteria;o__Actinomycetales;f__Nocardiaceae;g__Rhodococcus;s__
	OTU2040	p__Firmicutes;c__Clostridia;o__Clostridiales;f__Ruminococcaceae;g__;s__	OUT3324	p__Firmicutes;c__Clostridia;o__Clostridiales;f__Ruminococcaceae;g__;s__	OTU19168	p__Firmicutes;c__Clostridia;o__Clostridiales;f__Ruminococcaceae;g__;s__	OTU15670	p__Firmicutes;c__Clostridia;o__Clostridiales;f__Ruminococcaceae;g__;s__	OTU3519	p__Firmicutes;c__Clostridia;o__Clostridiales;f__Ruminococcaceae	OTU13463	p__Firmicutes;c__Clostridia;o__Clostridiales;f__Lachnospiraceae	OTU1506	p__Actinobacteria;c__Actinobacteria;o__Actinomycetales;f__Micrococcaceae
	OTU18450	p__Firmicutes;c__Clostridia;o__Clostridiales;f__Ruminococcaceae;g__;s__	OUT21196	p__Bacteroidetes;c__Bacteroidia;o__Bacteroidales;f__;g__;s__	OTU10952	p__Firmicutes;c__Clostridia;o__Clostridiales;f__Ruminococcaceae;g__;s__	OTU15994	p__Firmicutes;c__Clostridia;o__Clostridiales;f__Ruminococcaceae;g__;s__	OTU1584	p__Proteobacteria;c__Deltaproteobacteria	OTU16961	p__Firmicutes;c__Clostridia;o__Clostridiales;f__Lachnospiraceae	OTU2578	p__Firmicutes;c__Clostridia;o__Clostridiales;f__Lachnospiraceae;g__;s__
	OTU4744	p__Firmicutes;c__Clostridia;o__Clostridiales;f__Ruminococcaceae;g__;s__	OUT11265	p__Firmicutes;c__Clostridia;o__Clostridiales;f__Ruminococcaceae;g__;s__	OTU12675	p__Firmicutes;c__Clostridia;o__Clostridiales;f__Ruminococcaceae;g__;s__	OTU102	p__Firmicutes;c__Clostridia;o__Clostridiales;f__Ruminococcaceae;g__;s__	OTU3366	p__Firmicutes;c__Clostridia;o__Clostridiales	OTU16748	p__Firmicutes;c__Erysipelotrichi;o__Erysipelotrichales;f__Erysipelotrichaceae;g__Coprobacillus;s__	OTU1843	p__Firmicutes;c__Clostridia;o__Clostridiales;f__Lachnospiraceae;g__;s__
	OTU7024	p__Firmicutes;c__Clostridia;o__Clostridiales;f__Ruminococcaceae;g__;s__	OUT3315	p__Bacteroidetes;c__Bacteroidia;o__Bacteroidales;f__;g__;s__	OTU16878	p__Firmicutes;c__Clostridia;o__Clostridiales;f__Ruminococcaceae;g__;s__	OTU9377	p__Firmicutes;c__Clostridia;o__Clostridiales;f__Ruminococcaceae;g__;s__	OTU3770	p__Firmicutes;c__Clostridia;o__Clostridiales;f__;g__;s__	OTU73	p__Firmicutes;c__Erysipelotrichi;o__Erysipelotrichales;f__Erysipelotrichaceae;g__Coprobacillus;s__	OTU2195	p__Firmicutes;c__Clostridia;o__Clostridiales;f__Lachnospiraceae
	OTU14860	p__Firmicutes;c__Clostridia;o__Clostridiales;f__Ruminococcaceae;g__;s__	OUT22037	p__Spirochaetes;c__Spirochaetes;o__Spirochaetales;f__Spirochaetaceae;g__Treponema;s__	OTU3007	p__Firmicutes;c__Clostridia;o__Clostridiales;f__Ruminococcaceae;g__;s__	OTU15157	p__Firmicutes;c__Clostridia;o__Clostridiales;f__Ruminococcaceae;g__;s__	OTU3503	p__Firmicutes;c__Clostridia;o__Clostridiales	OTU29392	p__Firmicutes;c__Erysipelotrichi;o__Erysipelotrichales;f__Erysipelotrichaceae;g__[Eubacterium];s__dolichum	OTU7330	p__Firmicutes;c__Clostridia;o__Clostridiales;f__Lachnospiraceae
	OTU15653	p__Firmicutes;c__Clostridia;o__Clostridiales;f__Ruminococcaceae;g__;s__	OUT19653	p__Bacteroidetes;c__Bacteroidia;o__Bacteroidales;f__Bacteroidaceae;g__5-7N15;s__	OTU5204	p__Firmicutes;c__Clostridia;o__Clostridiales;f__Ruminococcaceae;g__Oscillospira	OTU15069	p__Firmicutes;c__Clostridia;o__Clostridiales;f__Ruminococcaceae;g__;s__	OTU3270	p__Firmicutes;c__Clostridia;o__Clostridiales;f__;g__;s__	OTU115	p__Bacteroidetes;c__Bacteroidia;o__Bacteroidales;f__Bacteroidaceae;g__5-7N15;s__	OTU7600	p__Firmicutes;c__Clostridia;o__Clostridiales;f__Lachnospiraceae
	OTU7017	p__Firmicutes;c__Clostridia;o__Clostridiales;f__Ruminococcaceae;g__;s__	OUT26274	p__Bacteroidetes;c__Bacteroidia;o__Bacteroidales;f__[Paraprevotellaceae];g__CF231;s__	OTU6737	p__Firmicutes;c__Clostridia;o__Clostridiales;f__Ruminococcaceae;g__;s__	OTU18531	p__Firmicutes;c__Clostridia;o__Clostridiales;f__Ruminococcaceae;g__;s__	OTU8772	p__Firmicutes;c__Clostridia;o__Clostridiales;f__Ruminococcaceae	OTU16985	p__Bacteroidetes;c__Bacteroidia;o__Bacteroidales;f__Bacteroidaceae;g__5-7N15;s__	OTU7656	p__Firmicutes;c__Clostridia;o__Clostridiales;f__Lachnospiraceae
	OTU6838	p__Firmicutes;c__Clostridia;o__Clostridiales;f__Ruminococcaceae;g__;s__	OUT11326	p__Bacteroidetes;c__Bacteroidia;o__Bacteroidales	OTU6910	p__Firmicutes;c__Clostridia;o__Clostridiales;f__Ruminococcaceae;g__;s__	OTU9569	p__Firmicutes;c__Clostridia;o__Clostridiales;f__Ruminococcaceae;g__;s__	OTU10871	p__Firmicutes;c__Clostridia;o__Clostridiales;f__Ruminococcaceae	OTU19391	p__Bacteroidetes;c__Bacteroidia;o__Bacteroidales;f__Bacteroidaceae;g__5-7N15;s__	OTU14023	p__Firmicutes;c__Clostridia;o__Clostridiales;f__Lachnospiraceae
	OTU6889	p__Firmicutes;c__Clostridia;o__Clostridiales;f__Ruminococcaceae;g__Oscillospira;s__	OUT5884	p__Firmicutes;c__Clostridia;o__Clostridiales;f__Lachnospiraceae;g__Butyrivibrio;s__	OTU8996	p__Firmicutes;c__Clostridia;o__Clostridiales;f__Ruminococcaceae;g__;s__	OTU11789	p__Firmicutes;c__Clostridia;o__Clostridiales;f__Ruminococcaceae;g__;s__	OTU14081	p__Firmicutes;c__Clostridia;o__Clostridiales;f__Ruminococcaceae;g__;s__	OTU22215	p__Bacteroidetes;c__Bacteroidia;o__Bacteroidales;f__Bacteroidaceae;g__;s__	OTU7533	p__Firmicutes;c__Clostridia;o__Clostridiales;f__Lachnospiraceae
	OTU10487	p__Firmicutes;c__Clostridia;o__Clostridiales;f__Ruminococcaceae;g__;s__	OUT10555	Unclassified bacteria	OTU9554	p__Firmicutes;c__Clostridia;o__Clostridiales;f__Ruminococcaceae;g__;s__	OTU1802	p__Firmicutes;c__Clostridia;o__Clostridiales;f__Ruminococcaceae;g__;s__	OTU19466	p__Spirochaetes;c__Spirochaetes;o__Spirochaetales;f__Spirochaetaceae;g__Treponema;s__	OTU24483	p__Bacteroidetes;c__Bacteroidia;o__Bacteroidales;f__Bacteroidaceae;g__5-7N15;s__	OTU18909	p__Fibrobacteres;c__Fibrobacteria;o__Fibrobacterales;f__Fibrobacteraceae;g__Fibrobacter;s__succinogenes
	OTU14125	p__Firmicutes;c__Clostridia;o__Clostridiales;f__Ruminococcaceae;g__;s__	OUT18502	p__Firmicutes;c__Clostridia;o__Clostridiales;f__Ruminococcaceae	OTU18934	p__Firmicutes;c__Clostridia;o__Clostridiales;f__Ruminococcaceae;g__;s__	OTU10203	p__Firmicutes;c__Clostridia;o__Clostridiales;f__Ruminococcaceae;g__Oscillospira;s__	OTU28788	p__Firmicutes;c__Clostridia;o__Clostridiales;f__Ruminococcaceae	OTU29654	p__Tenericutes;c__Mollicutes;o__RF39;f__;g__;s__	OTU18766	p__Actinobacteria;c__Coriobacteriia;o__Coriobacteriales;f__Coriobacteriaceae;g__Adlercreutzia;s__
	OTU3349	p__Firmicutes;c__Clostridia;o__Clostridiales;f__Ruminococcaceae;g__;s__	OUT15765	p__Firmicutes;c__Clostridia;o__Clostridiales;f__Ruminococcaceae;g__;s__	OTU11010	p__Firmicutes;c__Clostridia;o__Clostridiales;f__Ruminococcaceae;g__;s__	OTU14883	p__Firmicutes;c__Clostridia;o__Clostridiales;f__Ruminococcaceae;g__;s__	OTU9164	p__Firmicutes;c__Clostridia;o__Clostridiales;f__Ruminococcaceae;g__Oscillospira;s__	OTU29612	p__Tenericutes;c__Mollicutes;o__RF39;f__;g__;s__	OTU7385	p__Firmicutes;c__Clostridia;o__Clostridiales;f__Clostridiaceae
	OTU3267	p__Firmicutes;c__Clostridia;o__Clostridiales;f__Ruminococcaceae;g__;s__	OUT4129	p__Firmicutes;c__Clostridia;o__Clostridiales;f__Lachnospiraceae	OTU17585	p__Firmicutes;c__Clostridia;o__Clostridiales;f__Ruminococcaceae;g__;s__	OTU23083	p__Firmicutes;c__Clostridia;o__Clostridiales;f__Ruminococcaceae;g__;s__	OTU19520	p__Bacteroidetes;c__Bacteroidia;o__Bacteroidales;f__;g__;s__	OTU4454	p__Bacteroidetes;c__Bacteroidia;o__Bacteroidales;f__;g__;s__	OTU2216	p__Firmicutes;c__Bacilli;o__Bacillales;f__Bacillaceae;g__Bacillus
	OTU2991	p__Firmicutes;c__Clostridia;o__Clostridiales;f__Ruminococcaceae	OUT1723	p__Firmicutes;c__Clostridia;o__Clostridiales;f__;g__;s__	OTU4183	p__Firmicutes;c__Clostridia;o__Clostridiales;f__Ruminococcaceae;g__Oscillospira	OTU23520	p__Firmicutes;c__Clostridia;o__Clostridiales;f__Ruminococcaceae;g__;s__	OTU3410	p__Firmicutes;c__Clostridia;o__Clostridiales	OTU6989	p__Firmicutes;c__Clostridia;o__Clostridiales	OTU16889	p__Firmicutes;c__Clostridia;o__Clostridiales;f__[Mogibacteriaceae];g__;s__
	OTU6942	p__Firmicutes;c__Clostridia;o__Clostridiales;f__Ruminococcaceae	OUT1865	p__Firmicutes;c__Clostridia;o__Clostridiales;f__Lachnospiraceae	OTU18886	p__Firmicutes;c__Clostridia;o__Clostridiales;f__Ruminococcaceae;g__;s__	OTU14895	p__Firmicutes;c__Clostridia;o__Clostridiales;f__Ruminococcaceae;g__;s__	OTU19327	p__Bacteroidetes;c__Bacteroidia;o__Bacteroidales;f__;g__;s__	OTU3171	p__Firmicutes;c__Clostridia;o__Clostridiales	OTU3030	p__Firmicutes;c__Clostridia;o__Clostridiales;f__;g__;s__
	OTU7194	p__Firmicutes;c__Clostridia;o__Clostridiales;f__Ruminococcaceae	OUT3058	p__Firmicutes;c__Clostridia;o__Clostridiales;f__Ruminococcaceae;g__Ruminococcus	OTU6882	p__Firmicutes;c__Clostridia;o__Clostridiales;f__Ruminococcaceae;g__Ruminococcus;s__	OTU20941	p__Firmicutes;c__Clostridia;o__Clostridiales;f__Ruminococcaceae;g__;s__	OTU5228	p__Firmicutes;c__Clostridia;o__Clostridiales	OTU14861	p__Firmicutes	OTU2330	p__Firmicutes;c__Clostridia;o__Clostridiales;f__;g__;s__
	OTU8665	p__Firmicutes;c__Clostridia;o__Clostridiales;f__Ruminococcaceae	OUT15081	p__Firmicutes;c__Clostridia;o__Clostridiales;f__Ruminococcaceae;g__;s__	OTU7688	p__Firmicutes;c__Clostridia;o__Clostridiales;f__Ruminococcaceae;g__Oscillospira;s__	OTU7841	p__Firmicutes;c__Clostridia;o__Clostridiales;f__Ruminococcaceae;g__;s__	OTU2705	p__Firmicutes;c__Clostridia;o__Clostridiales			OTU2288	p__Firmicutes;c__Clostridia;o__Clostridiales;f__;g__;s__
	OTU6620	p__Firmicutes;c__Clostridia;o__Clostridiales;f__Ruminococcaceae	OUT19586	p__Firmicutes;c__Clostridia;o__Clostridiales;f__;g__;s__	OTU10949	p__Firmicutes;c__Clostridia;o__Clostridiales;f__Ruminococcaceae;g__Ruminococcus	OTU8153	p__Firmicutes;c__Clostridia;o__Clostridiales;f__Ruminococcaceae;g__;s__	OTU20053	p__Bacteroidetes;c__Bacteroidia;o__Bacteroidales;f__;g__;s__			OTU1590	p__Firmicutes;c__Clostridia;o__Clostridiales;f__;g__;s__
	OTU9685	p__Firmicutes;c__Clostridia;o__Clostridiales;f__Ruminococcaceae	OUT21332	p__Bacteroidetes	OTU19904	p__Firmicutes;c__Clostridia;o__Clostridiales;f__Ruminococcaceae;g__;s__	OTU12496	p__Firmicutes;c__Clostridia;o__Clostridiales;f__Ruminococcaceae;g__;s__	OTU4990	p__Firmicutes;c__Clostridia;o__Clostridiales;f__Ruminococcaceae			OTU2215	p__Firmicutes;c__Clostridia;o__Clostridiales
	OTU7002	p__Firmicutes;c__Clostridia;o__Clostridiales;f__Ruminococcaceae	OUT22536	p__Bacteroidetes;c__Bacteroidia;o__Bacteroidales;f__Bacteroidaceae;g__5-7N15;s__	OTU99	p__Firmicutes;c__Clostridia;o__Clostridiales;f__Ruminococcaceae;g__;s__	OTU16596	p__Firmicutes;c__Clostridia;o__Clostridiales;f__Ruminococcaceae;g__;s__	OTU27033	p__Tenericutes;c__Mollicutes;o__RF39;f__;g__;s__			OTU12352	p__Firmicutes;c__Clostridia;o__Clostridiales
	OTU18466	p__Bacteroidetes;c__Bacteroidia;o__Bacteroidales;f__Rikenellaceae;g__;s__	OUT18921	p__Bacteroidetes;c__Bacteroidia;o__Bacteroidales;f__;g__;s__	OTU195	p__Firmicutes;c__Clostridia;o__Clostridiales;f__Ruminococcaceae;g__;s__	OTU23553	p__Firmicutes;c__Clostridia;o__Clostridiales;f__Ruminococcaceae;g__;s__	OTU6213	p__Fibrobacteres;c__Fibrobacteria;o__Fibrobacterales;f__Fibrobacteraceae;g__Fibrobacter;s__succinogenes			OTU2859	p__Firmicutes;c__Clostridia;o__Clostridiales
	OTU3525	p__Planctomycetes;c__Planctomycetia;o__Pirellulales;f__Pirellulaceae;g__;s__	OUT3286	p__Firmicutes;c__Clostridia;o__Clostridiales;f__Ruminococcaceae;g__;s__	OTU2535	p__Firmicutes;c__Clostridia;o__Clostridiales;f__Ruminococcaceae;g__;s__	OTU15328	p__Firmicutes;c__Clostridia;o__Clostridiales;f__Ruminococcaceae;g__;s__	OTU3185	p__Firmicutes;c__Clostridia;o__Clostridiales;f__;g__;s__			OTU2402	p__Firmicutes;c__Clostridia;o__Clostridiales
	OTU1964	p__Planctomycetes;c__Planctomycetia;o__Pirellulales;f__Pirellulaceae;g__;s__	OUT4056	p__Firmicutes;c__Clostridia;o__Clostridiales;f__Ruminococcaceae;g__;s__	OTU4152	p__Firmicutes;c__Clostridia;o__Clostridiales;f__Ruminococcaceae;g__Papillibacter;s__cinnamivorans	OTU16004	p__Firmicutes;c__Clostridia;o__Clostridiales;f__Ruminococcaceae;g__;s__	OTU6878	p__Firmicutes;c__Clostridia;o__Clostridiales;f__Ruminococcaceae			OTU9727	p__Firmicutes;c__Clostridia;o__Clostridiales
	OTU14876	p__Planctomycetes;c__Planctomycetia;o__Pirellulales;f__Pirellulaceae;g__;s__	OUT5180	p__Firmicutes;c__Clostridia;o__Clostridiales;f__Ruminococcaceae;g__Ruminococcus;s__	OTU5322	p__Firmicutes;c__Clostridia;o__Clostridiales;f__Ruminococcaceae;g__;s__	OTU24391	p__Firmicutes;c__Clostridia;o__Clostridiales;f__Ruminococcaceae;g__;s__	OTU18452	p__Firmicutes;c__Clostridia;o__Clostridiales			OTU2238	p__Firmicutes;c__Bacilli;o__Bacillales
	OTU15703	p__Firmicutes;c__Clostridia;o__Clostridiales;f__Peptostreptococcaceae	OUT21642	p__Bacteroidetes;c__Bacteroidia;o__Bacteroidales;f__Bacteroidaceae;g__5-7N15;s__	OTU15520	p__Firmicutes;c__Clostridia;o__Clostridiales;f__Ruminococcaceae;g__;s__	OTU8462	p__Firmicutes;c__Clostridia;o__Clostridiales;f__Ruminococcaceae	OTU3246	p__Firmicutes;c__Clostridia;o__Clostridiales;f__;g__;s__			OTU2223	p__Firmicutes;c__Bacilli;o__Bacillales
	OTU2910	p__Firmicutes;c__Clostridia;o__Clostridiales;f__Peptococcaceae;g__rc4-4;s__	OUT15361	p__Firmicutes;c__Clostridia;o__Clostridiales;f__Ruminococcaceae;g__;s__	OTU21841	p__Firmicutes;c__Clostridia;o__Clostridiales;f__Ruminococcaceae;g__;s__	OTU3368	p__Firmicutes;c__Clostridia;o__Clostridiales;f__Ruminococcaceae	OTU7136	p__Firmicutes;c__Clostridia;o__Clostridiales;f__Ruminococcaceae;g__;s__			OTU2343	p__Firmicutes;c__Bacilli;o__Bacillales
	OTU21928	p__Bacteroidetes;c__Bacteroidia;o__Bacteroidales;f__p-2534-18B5;g__;s__	OUT15684	p__Firmicutes;c__Clostridia;o__Clostridiales;f__Ruminococcaceae	OTU4246	p__Firmicutes;c__Clostridia;o__Clostridiales;f__Ruminococcaceae;g__;s__	OTU16115	p__Firmicutes;c__Clostridia;o__Clostridiales;f__Ruminococcaceae	OTU2835	p__Firmicutes;c__Clostridia;o__Clostridiales;f__Ruminococcaceae
	OTU6789	p__Firmicutes;c__Clostridia;o__Clostridiales;f__Lachnospiraceae;g__Butyrivibrio;s__	OUT25779	p__Bacteroidetes;c__Bacteroidia;o__Bacteroidales;f__Rikenellaceae;g__;s__	OTU4457	p__Firmicutes;c__Clostridia;o__Clostridiales;f__Ruminococcaceae;g__;s__	OTU20205	p__Firmicutes;c__Clostridia;o__Clostridiales;f__Ruminococcaceae	OTU3183	p__Firmicutes;c__Clostridia;o__Clostridiales;f__;g__;s__
	OTU6941	p__Firmicutes;c__Clostridia;o__Clostridiales;f__Lachnospiraceae;g__;s__	OUT2945	p__Firmicutes;c__Clostridia;o__Clostridiales;f__Ruminococcaceae;g__;s__	OTU5280	p__Firmicutes;c__Clostridia;o__Clostridiales;f__Ruminococcaceae;g__;s__	OTU9318	p__Firmicutes;c__Clostridia;o__Clostridiales;f__Ruminococcaceae	OTU8475	p__Firmicutes;c__Clostridia;o__Clostridiales;f__Lachnospiraceae
	OTU1960	p__Firmicutes;c__Clostridia;o__Clostridiales;f__Lachnospiraceae	OUT3566	p__Firmicutes;c__Clostridia;o__Clostridiales	OTU8362	p__Firmicutes;c__Clostridia;o__Clostridiales;f__Ruminococcaceae;g__;s__	OTU11655	p__Firmicutes;c__Clostridia;o__Clostridiales;f__Ruminococcaceae	OTU20090	p__Spirochaetes;c__Spirochaetes;o__Spirochaetales;f__Spirochaetaceae;g__Treponema;s__
	OTU9753	p__Firmicutes;c__Clostridia;o__Clostridiales;f__Clostridiaceae;g__Clostridium;s__celatum	OUT6736	p__Firmicutes;c__Clostridia;o__Clostridiales;f__Ruminococcaceae;g__;s__	OTU8563	p__Firmicutes;c__Clostridia;o__Clostridiales;f__Ruminococcaceae;g__;s__	OTU11723	p__Firmicutes;c__Clostridia;o__Clostridiales;f__Ruminococcaceae	OTU27932	p__Bacteroidetes;c__Bacteroidia;o__Bacteroidales;f__[Paraprevotellaceae];g__CF231;s__
	OTU1696	p__Firmicutes;c__Clostridia;o__Clostridiales;f__Christensenellaceae;g__;s__	OUT6934	p__Firmicutes;c__Clostridia;o__Clostridiales;f__Ruminococcaceae	OTU9313	p__Firmicutes;c__Clostridia;o__Clostridiales;f__Ruminococcaceae;g__;s__	OTU3563	p__Firmicutes;c__Clostridia;o__Clostridiales;f__Ruminococcaceae	OTU1734	p__Firmicutes;c__Clostridia;o__Clostridiales;f__Ruminococcaceae;g__;s__
	OTU1649	p__Actinobacteria;c__Actinobacteria;o__Bifidobacteriales;f__Bifidobacteriaceae;g__Bifidobacterium;s__pseudolongum	OUT7823	p__Firmicutes;c__Clostridia;o__Clostridiales;f__Ruminococcaceae;g__Oscillospira;s__	OTU18332	p__Firmicutes;c__Clostridia;o__Clostridiales;f__Ruminococcaceae;g__;s__	OTU17194	p__Firmicutes;c__Clostridia;o__Clostridiales;f__Ruminococcaceae	OTU6222	p__Firmicutes;c__Clostridia;o__Clostridiales;f__Ruminococcaceae;g__Ruminococcus;s__
	OTU18181	p__Bacteroidetes;c__Bacteroidia;o__Bacteroidales;f__Bacteroidaceae;g__5-7N15;s__	OUT9951	p__Firmicutes;c__Clostridia;o__Clostridiales;f__Ruminococcaceae	OTU8885	p__Firmicutes;c__Clostridia;o__Clostridiales;f__Ruminococcaceae;g__Oscillospira;s__	OTU8616	p__Firmicutes;c__Clostridia;o__Clostridiales;f__Ruminococcaceae	OTU6929	p__Firmicutes;c__Clostridia;o__Clostridiales;f__Ruminococcaceae
	OTU13039	p__Firmicutes;c__Clostridia;o__Clostridiales;f__[Mogibacteriaceae];g__;s__	OUT14894	p__Firmicutes;c__Clostridia;o__Clostridiales;f__Ruminococcaceae;g__;s__	OTU9922	p__Firmicutes;c__Clostridia;o__Clostridiales;f__Ruminococcaceae;g__;s__	OTU6961	p__Firmicutes;c__Clostridia;o__Clostridiales;f__Ruminococcaceae	OTU7219	p__Firmicutes;c__Clostridia;o__Clostridiales;f__Ruminococcaceae;g__;s__
	OTU10594	p__Tenericutes;c__Mollicutes;o__RF39;f__;g__;s__	OUT15523	p__Firmicutes;c__Clostridia;o__Clostridiales;f__Ruminococcaceae;g__;s__	OTU1995	p__Firmicutes;c__Clostridia;o__Clostridiales;f__Ruminococcaceae;g__;s__	OTU6993	p__Firmicutes;c__Clostridia;o__Clostridiales;f__Ruminococcaceae	OTU9296	p__Firmicutes;c__Clostridia;o__Clostridiales;f__Ruminococcaceae
	OTU29088	p__Tenericutes;c__Mollicutes;o__RF39;f__;g__;s__	OUT16081	p__Proteobacteria;c__Alphaproteobacteria;o__Rickettsiales;f__;g__;s__	OTU3706	p__Firmicutes;c__Clostridia;o__Clostridiales;f__Ruminococcaceae;g__;s__	OTU14953	p__Firmicutes;c__Clostridia;o__Clostridiales;f__Ruminococcaceae	OTU15238	p__Firmicutes;c__Clostridia;o__Clostridiales;f__Lachnospiraceae;g__Epulopiscium;s__
	OTU8742	p__Tenericutes;c__Mollicutes;o__RF39;f__;g__;s__	OUT18368	p__Firmicutes;c__Clostridia;o__Clostridiales;f__Ruminococcaceae;g__;s__	OTU7231	p__Firmicutes;c__Clostridia;o__Clostridiales;f__Ruminococcaceae;g__;s__	OTU15873	p__Firmicutes;c__Clostridia;o__Clostridiales;f__Ruminococcaceae	OTU19794	p__Firmicutes;c__Clostridia;o__Clostridiales;f__Ruminococcaceae;g__;s__
	OTU29048	p__Tenericutes;c__Mollicutes;o__RF39;f__;g__;s__	OUT19902	p__Bacteroidetes;c__Bacteroidia;o__Bacteroidales;f__Bacteroidaceae;g__5-7N15;s__	OTU7852	p__Firmicutes;c__Clostridia;o__Clostridiales;f__Ruminococcaceae;g__Ruminococcus;s__	OTU22445	p__Firmicutes;c__Clostridia;o__Clostridiales;f__Ruminococcaceae	OTU19848	p__Bacteroidetes;c__Bacteroidia;o__Bacteroidales;f__;g__;s__
	OTU29642	p__Tenericutes;c__Mollicutes;o__RF39;f__;g__;s__	OUT2614	p__Firmicutes;c__Clostridia;o__Clostridiales;f__Ruminococcaceae;g__Ruminococcus;s__	OTU9326	p__Firmicutes;c__Clostridia;o__Clostridiales;f__Ruminococcaceae;g__;s__	OTU16112	p__Firmicutes;c__Clostridia;o__Clostridiales;f__Ruminococcaceae	OTU20047	p__Bacteroidetes;c__Bacteroidia;o__Bacteroidales;f__[Paraprevotellaceae];g__[Prevotella];s__
	OTU29182	p__Tenericutes;c__Mollicutes;o__RF39;f__;g__;s__	OUT6983	p__Firmicutes;c__Clostridia;o__Clostridiales;f__Ruminococcaceae;g__;s__	OTU9614	p__Firmicutes;c__Clostridia;o__Clostridiales;f__Ruminococcaceae;g__Ruminococcus	OTU22442	p__Bacteroidetes;c__Bacteroidia;o__Bacteroidales;f__Rikenellaceae;g__;s__	OTU29505	p__Tenericutes;c__Mollicutes;o__RF39;f__;g__;s__
	OTU29196	p__Tenericutes;c__Mollicutes;o__RF39;f__;g__;s__	OUT8419	p__Firmicutes;c__Clostridia;o__Clostridiales;f__Ruminococcaceae;g__;s__	OTU9901	p__Firmicutes;c__Clostridia;o__Clostridiales;f__Ruminococcaceae;g__;s__	OTU26211	p__Bacteroidetes;c__Bacteroidia;o__Bacteroidales;f__Rikenellaceae;g__;s__	OTU16979	p__Firmicutes;c__Clostridia;o__Clostridiales;f__Ruminococcaceae
	OTU14879	p__Spirochaetes;c__Spirochaetes;o__M2PT2-76;f__;g__;s__	OUT9872	p__Firmicutes;c__Clostridia;o__Clostridiales;f__Ruminococcaceae;g__Ruminococcus;s__flavefaciens	OTU10828	p__Firmicutes;c__Clostridia;o__Clostridiales;f__Ruminococcaceae;g__;s__	OTU27164	p__Bacteroidetes;c__Bacteroidia;o__Bacteroidales;f__Rikenellaceae;g__;s__	OTU2155	p__Firmicutes;c__Clostridia;o__Clostridiales;f__;g__;s__
	OTU1881	p__Proteobacteria;c__Deltaproteobacteria;o__GMD14H09;f__;g__;s__	OUT10870	p__Firmicutes;c__Clostridia;o__Clostridiales;f__Ruminococcaceae	OTU19915	p__Firmicutes;c__Clostridia;o__Clostridiales;f__Ruminococcaceae;g__;s__	OTU19087	p__Bacteroidetes;c__Bacteroidia;o__Bacteroidales;f__Rikenellaceae;g__;s__	OTU6923	p__Firmicutes;c__Clostridia;o__Clostridiales;f__Ruminococcaceae
	OTU1851	p__Proteobacteria;c__Deltaproteobacteria;o__GMD14H09;f__;g__;s__	OUT19990	p__Bacteroidetes;c__Bacteroidia;o__Bacteroidales;f__Bacteroidaceae;g__5-7N15;s__	OTU4104	p__Firmicutes;c__Clostridia;o__Clostridiales;f__Ruminococcaceae;g__;s__	OTU23756	p__Bacteroidetes;c__Bacteroidia;o__Bacteroidales;f__Rikenellaceae	OTU8819	p__Firmicutes;c__Clostridia;o__Clostridiales;f__Ruminococcaceae;g__Oscillospira
	OTU1774	p__Proteobacteria;c__Deltaproteobacteria;o__GMD14H09;f__;g__;s__	OUT22013	p__Bacteroidetes;c__Bacteroidia;o__Bacteroidales;f__Rikenellaceae;g__;s__	OTU5114	p__Firmicutes;c__Clostridia;o__Clostridiales;f__Ruminococcaceae;g__;s__	OTU4453	p__Verrucomicrobia;c__Verruco-5;o__WCHB1-41;f__RFP12;g__;s__	OTU8944	p__Firmicutes;c__Clostridia;o__Clostridiales;f__Veillonellaceae
	OTU1488	p__Proteobacteria;c__Deltaproteobacteria;o__GMD14H09;f__;g__;s__	OUT2032	p__Firmicutes;c__Clostridia;o__Clostridiales;f__;g__;s__	OTU8249	p__Firmicutes;c__Clostridia;o__Clostridiales;f__Ruminococcaceae;g__;s__	OTU25773	p__Bacteroidetes;c__Bacteroidia;o__Bacteroidales;f__Prevotellaceae;g__Prevotella;s__	OTU8976	p__Firmicutes;c__Clostridia;o__Clostridiales;f__Ruminococcaceae
	OTU1579	p__Firmicutes;c__Clostridia;o__Clostridiales;f__;g__;s__	OUT3667	p__Firmicutes;c__Clostridia;o__Clostridiales	OTU10297	p__Firmicutes;c__Clostridia;o__Clostridiales;f__Ruminococcaceae;g__;s__	OTU5395	p__Firmicutes;c__Clostridia;o__Clostridiales;f__Peptococcaceae;g__rc4-4;s__	OTU9396	p__Firmicutes;c__Clostridia;o__Clostridiales;f__Lachnospiraceae;g__Coprococcus;s__
	OTU1890	p__Firmicutes;c__Clostridia;o__Clostridiales;f__;g__;s__	OUT4903	p__Firmicutes;c__Clostridia;o__Clostridiales	OTU11461	p__Firmicutes;c__Clostridia;o__Clostridiales;f__Ruminococcaceae;g__;s__	OTU12970	p__Bacteroidetes;c__Bacteroidia;o__Bacteroidales;f__p-2534-18B5;g__;s__	OTU15438	p__Firmicutes;c__Clostridia;o__Clostridiales;f__Ruminococcaceae
	OTU16871	p__Bacteroidetes;c__Bacteroidia;o__Bacteroidales;f__;g__;s__	OUT9567	p__Firmicutes;c__Clostridia;o__Clostridiales;f__Lachnospiraceae	OTU12536	p__Firmicutes;c__Clostridia;o__Clostridiales;f__Ruminococcaceae;g__;s__	OTU3885	p__Firmicutes;c__Clostridia;o__Clostridiales;f__Lachnospiraceae;g__;s__	OTU17354	p__Bacteroidetes;c__Bacteroidia;o__Bacteroidales;f__[Barnesiellaceae];g__;s__
	OTU6918	p__Firmicutes;c__Clostridia;o__Clostridiales	OUT11310	p__Firmicutes;c__Clostridia;o__Clostridiales;f__Ruminococcaceae	OTU15057	p__Firmicutes;c__Clostridia;o__Clostridiales;f__Ruminococcaceae;g__;s__	OTU7016	p__Firmicutes;c__Clostridia;o__Clostridiales;f__Lachnospiraceae;g__Coprococcus;s__	OTU18353	p__Firmicutes;c__Clostridia;o__Clostridiales;f__Ruminococcaceae;g__;s__
	OTU1969	p__Firmicutes;c__Clostridia;o__Clostridiales	OUT11614	p__Firmicutes;c__Clostridia;o__Clostridiales;f__Ruminococcaceae;g__;s__	OTU17138	p__Firmicutes;c__Clostridia;o__Clostridiales;f__Ruminococcaceae;g__;s__	OTU2105	p__Firmicutes;c__Clostridia;o__Clostridiales;f__Lachnospiraceae;g__;s__	OTU25573	p__Bacteroidetes;c__Bacteroidia;o__Bacteroidales;f__;g__;s__
	OTU1885	p__Firmicutes;c__Clostridia;o__Clostridiales	OUT14373	p__Firmicutes;c__Clostridia;o__Clostridiales;f__Ruminococcaceae;g__;s__	OTU17149	p__Firmicutes;c__Clostridia;o__Clostridiales;f__Ruminococcaceae;g__;s__	OTU11376	p__Firmicutes;c__Clostridia;o__Clostridiales;f__Lachnospiraceae;g__;s__	OTU2461	p__Firmicutes;c__Clostridia;o__Clostridiales
	OTU3959	p__Firmicutes;c__Clostridia;o__Clostridiales	OUT15635	p__Firmicutes;c__Clostridia	OTU19942	p__Firmicutes;c__Clostridia;o__Clostridiales;f__Ruminococcaceae;g__;s__	OTU4348	p__Firmicutes;c__Clostridia;o__Clostridiales;f__Lachnospiraceae;g__;s__	OTU3110	p__Firmicutes;c__Clostridia;o__Clostridiales
	OTU2037	p__Proteobacteria;c__Deltaproteobacteria	OUT18970	p__Bacteroidetes;c__Bacteroidia;o__Bacteroidales;f__Bacteroidaceae;g__5-7N15;s__	OTU1571	p__Firmicutes;c__Clostridia;o__Clostridiales;f__Ruminococcaceae	OTU7556	p__Firmicutes;c__Clostridia;o__Clostridiales;f__Lachnospiraceae	OTU3335	p__Firmicutes;c__Clostridia;o__Clostridiales;f__Ruminococcaceae;g__;s__
	OTU2072	p__Firmicutes;c__Clostridia	OUT20567	p__Bacteroidetes;c__Bacteroidia;o__Bacteroidales;f__Bacteroidaceae;g__5-7N15;s__	OTU15507	p__Firmicutes;c__Clostridia;o__Clostridiales;f__Ruminococcaceae	OTU13915	p__Fibrobacteres;c__Fibrobacteria;o__Fibrobacterales;f__Fibrobacteraceae;g__Fibrobacter;s__succinogenes	OTU3796	p__Firmicutes;c__Clostridia;o__Clostridiales;f__;g__;s__
			OUT22505	p__Bacteroidetes;c__Bacteroidia;o__Bacteroidales;f__Rikenellaceae;g__;s__	OTU2009	p__Firmicutes;c__Clostridia;o__Clostridiales;f__Ruminococcaceae	OTU28949	p__Firmicutes;c__Clostridia;o__Clostridiales;f__Eubacteriaceae;g__Anaerofustis;s__	OTU8171	p__Firmicutes;c__Clostridia;o__Clostridiales;f__Ruminococcaceae;g__;s__
			OUT28976	p__Firmicutes;c__Clostridia;o__Clostridiales;f__Eubacteriaceae;g__Pseudoramibacter_Eubacterium;s__	OTU3602	p__Firmicutes;c__Clostridia;o__Clostridiales;f__Ruminococcaceae	OTU1763	p__Actinobacteria;c__Actinobacteria;o__Actinomycetales;f__Corynebacteriaceae;g__Corynebacterium;s__	OTU8745	p__Firmicutes;c__Clostridia;o__Clostridiales;f__Ruminococcaceae
			OUT2624	p__Firmicutes;c__Clostridia;o__Clostridiales;f__Christensenellaceae;g__;s__	OTU3311	p__Firmicutes;c__Clostridia;o__Clostridiales;f__Ruminococcaceae	OTU18477	p__Actinobacteria;c__Coriobacteriia;o__Coriobacteriales;f__Coriobacteriaceae	OTU8916	p__Bacteroidetes;c__Bacteroidia;o__Bacteroidales;f__RF16;g__;s__
			OUT3301	p__Firmicutes;c__Clostridia;o__Clostridiales;f__Ruminococcaceae;g__Ruminococcus	OTU1743	p__Firmicutes;c__Clostridia;o__Clostridiales;f__Ruminococcaceae	OTU3853	p__Firmicutes;c__Clostridia;o__Clostridiales;f__Clostridiaceae;g__Clostridium;s__	OTU14574	p__Firmicutes;c__Clostridia;o__Clostridiales;f__[Mogibacteriaceae];g__;s__
			OUT6788	p__Firmicutes;c__Clostridia;o__Clostridiales;f__Ruminococcaceae;g__Ruminococcus	OTU8588	p__Firmicutes;c__Clostridia;o__Clostridiales;f__Ruminococcaceae	OTU4097	p__Firmicutes;c__Clostridia;o__Clostridiales;f__Clostridiaceae;g__Clostridium;s__	OTU14832	p__Firmicutes;c__Clostridia;o__Clostridiales;f__Ruminococcaceae
			OUT7130	p__Firmicutes;c__Clostridia;o__Clostridiales;f__Ruminococcaceae	OTU9758	p__Firmicutes;c__Clostridia;o__Clostridiales;f__Ruminococcaceae	OTU5643	p__Firmicutes;c__Clostridia;o__Clostridiales;f__Clostridiaceae;g__Clostridium;s__	OTU18937	p__Proteobacteria;c__Deltaproteobacteria;o__Desulfovibrionales;f__Desulfovibrionaceae;g__Desulfovibrio;s__
			OUT7734	p__Firmicutes;c__Clostridia;o__Clostridiales;f__Ruminococcaceae;g__Oscillospira;s__	OTU9759	p__Firmicutes;c__Clostridia;o__Clostridiales;f__Ruminococcaceae	OTU1945	p__Firmicutes;c__Clostridia;o__Clostridiales;f__Christensenellaceae;g__;s__	OTU19219	p__Bacteroidetes;c__Bacteroidia;o__Bacteroidales;f__;g__;s__
			OUT8052	p__Firmicutes;c__Clostridia;o__Clostridiales;f__Ruminococcaceae;g__;s__	OTU1610	p__Firmicutes;c__Clostridia;o__Clostridiales;f__Ruminococcaceae	OTU4000	p__Firmicutes;c__Clostridia;o__Clostridiales;f__Christensenellaceae;g__;s__	OTU22855	p__Bacteroidetes;c__Bacteroidia;o__Bacteroidales;f__Bacteroidaceae;g__;s__
			OUT9416	p__Firmicutes;c__Clostridia;o__Clostridiales;f__Ruminococcaceae;g__;s__	OTU15233	p__Firmicutes;c__Clostridia;o__Clostridiales;f__Ruminococcaceae	OTU22850	p__Bacteroidetes;c__Bacteroidia;o__Bacteroidales;f__BS11;g__;s__	OTU2039	p__Firmicutes;c__Clostridia;o__Clostridiales
			OUT11037	p__Firmicutes;c__Clostridia;o__Clostridiales;f__Ruminococcaceae;g__Ruminococcus;s__	OTU15514	p__Firmicutes;c__Clostridia;o__Clostridiales;f__Ruminococcaceae	OTU20141	p__Bacteroidetes;c__Bacteroidia;o__Bacteroidales;f__BS11;g__;s__	OTU2070	p__Firmicutes;c__Clostridia;o__Clostridiales;f__Ruminococcaceae
			OUT11075	p__Firmicutes;c__Clostridia;o__Clostridiales;f__Ruminococcaceae;g__;s__	OTU15578	p__Firmicutes;c__Clostridia;o__Clostridiales;f__Ruminococcaceae	OTU18218	p__Bacteroidetes;c__Bacteroidia;o__Bacteroidales;f__Bacteroidaceae;g__;s__	OTU2603	p__Firmicutes;c__Clostridia;o__Clostridiales
			OUT12225	p__Firmicutes;c__Clostridia;o__Clostridiales;f__Ruminococcaceae;g__;s__	OTU7868	p__Firmicutes;c__Clostridia;o__Clostridiales;f__Ruminococcaceae	OTU20690	p__Bacteroidetes;c__Bacteroidia;o__Bacteroidales;f__Bacteroidaceae;g__;s__	OTU4330	p__Firmicutes;c__Clostridia;o__Clostridiales
			OUT15053	p__Tenericutes;c__Mollicutes;o__RF39;f__;g__;s__	OTU8118	p__Firmicutes;c__Clostridia;o__Clostridiales;f__Ruminococcaceae	OTU27972	p__Bacteroidetes;c__Bacteroidia;o__Bacteroidales;f__Bacteroidaceae;g__;s__	OTU7335	p__Firmicutes;c__Clostridia;o__Clostridiales;f__Clostridiaceae
			OUT15532	p__Firmicutes;c__Clostridia;o__Clostridiales;f__Ruminococcaceae	OTU25825	p__Bacteroidetes;c__Bacteroidia;o__Bacteroidales;f__Rikenellaceae;g__;s__	OTU23530	p__Bacteroidetes;c__Bacteroidia;o__Bacteroidales;f__Bacteroidaceae;g__5-7N15;s__	OTU16981	p__Firmicutes;c__Clostridia;o__Clostridiales;f__[Mogibacteriaceae];g__;s__
			OUT16977	p__Firmicutes;c__Clostridia;o__Clostridiales;f__Ruminococcaceae;g__;s__	OTU17549	p__Bacteroidetes;c__Bacteroidia;o__Bacteroidales;f__Rikenellaceae;g__;s__	OTU27331	p__Bacteroidetes;c__Bacteroidia;o__Bacteroidales;f__Bacteroidaceae;g__;s__	OTU20073	p__Bacteroidetes;c__Bacteroidia;o__Bacteroidales;f__;g__;s__
			OUT17706	p__Bacteroidetes;c__Bacteroidia;o__Bacteroidales;f__;g__;s__	OTU19856	p__Bacteroidetes;c__Bacteroidia;o__Bacteroidales;f__Rikenellaceae;g__;s__	OTU27051	p__Bacteroidetes;c__Bacteroidia;o__Bacteroidales;f__Bacteroidaceae;g__;s__	OTU29291	p__Tenericutes;c__Mollicutes;o__RF39;f__;g__;s__
			OUT18415	p__Firmicutes;c__Clostridia;o__Clostridiales;f__Ruminococcaceae;g__;s__	OTU20641	p__Bacteroidetes;c__Bacteroidia;o__Bacteroidales;f__Rikenellaceae;g__;s__	OTU25791	p__Bacteroidetes;c__Bacteroidia;o__Bacteroidales;f__Bacteroidaceae;g__;s__	OTU1780	p__Firmicutes;c__Clostridia;o__Clostridiales;f__Ruminococcaceae
			OUT19458	p__Bacteroidetes;c__Bacteroidia;o__Bacteroidales;f__Bacteroidaceae;g__5-7N15;s__	OTU4230	p__Verrucomicrobia;c__Verruco-5;o__WCHB1-41;f__RFP12;g__;s__	OTU18551	p__Bacteroidetes;c__Bacteroidia;o__Bacteroidales;f__Bacteroidaceae;g__;s__	OTU2088	p__Firmicutes
			OUT21902	p__Bacteroidetes;c__Bacteroidia;o__Bacteroidales;f__;g__;s__	OTU9811	p__Bacteroidetes;c__Bacteroidia;o__Bacteroidales;f__RF16;g__;s__	OTU1679	p__Chloroflexi;c__Anaerolineae;o__Anaerolineales;f__Anaerolinaceae;g__SHD-231;s__	OTU2390	p__Firmicutes;c__Clostridia;o__Clostridiales;f__Christensenellaceae;g__;s__
			OUT22125	p__Bacteroidetes;c__Bacteroidia;o__Bacteroidales;f__;g__;s__	OTU25817	p__Bacteroidetes;c__Bacteroidia;o__Bacteroidales;f__RF16;g__;s__	OTU1785	p__Chloroflexi;c__Anaerolineae;o__Anaerolineales;f__Anaerolinaceae;g__SHD-231;s__	OTU3802	p__Firmicutes;c__Clostridia;o__Clostridiales;f__Ruminococcaceae;g__;s__
			OUT22535	p__Bacteroidetes;c__Bacteroidia;o__Bacteroidales;f__Rikenellaceae;g__;s__	OTU7145	p__Bacteroidetes;c__Bacteroidia;o__Bacteroidales;f__RF16;g__;s__	OTU2551	p__Chloroflexi;c__Anaerolineae;o__Anaerolineales;f__Anaerolinaceae;g__SHD-231;s__	OTU6937	p__Firmicutes;c__Clostridia;o__Clostridiales;f__Ruminococcaceae;g__;s__
					OTU12150	p__Bacteroidetes;c__Bacteroidia;o__Bacteroidales;f__RF16;g__;s__	OTU26545	p__Bacteroidetes;c__Bacteroidia;o__Bacteroidales;f__[Paraprevotellaceae];g__CF231;s__	OTU7212	Unclassified bacteria
					OTU17558	p__Bacteroidetes;c__Bacteroidia;o__Bacteroidales;f__Prevotellaceae;g__Prevotella;s__	OTU15697	p__Firmicutes;c__Clostridia;o__Clostridiales;f__[Mogibacteriaceae];g__;s__	OTU8794	p__Firmicutes;c__Clostridia;o__Clostridiales;f__Ruminococcaceae;g__Ruminococcus;s__flavefaciens
					OTU18602	p__Bacteroidetes;c__Bacteroidia;o__Bacteroidales;f__Porphyromonadaceae;g__Paludibacter;s__	OTU17713	p__Bacteroidetes;c__Bacteroidia;o__Bacteroidales;f__[Barnesiellaceae];g__;s__	OTU8796	p__Firmicutes;c__Clostridia;o__Clostridiales;f__Ruminococcaceae;g__Ruminococcus
					OTU10420	p__Bacteroidetes;c__Bacteroidia;o__Bacteroidales;f__Porphyromonadaceae;g__Paludibacter;s__	OTU2939	p__Cyanobacteria;c__4C0d-2;o__YS2;f__;g__;s__	OTU8878	p__Firmicutes;c__Clostridia;o__Clostridiales
					OTU8951	p__Firmicutes;c__Clostridia;o__Clostridiales;f__Lachnospiraceae;g__;s__	OTU1908	p__Cyanobacteria;c__4C0d-2;o__YS2;f__;g__;s__	OTU9112	p__Firmicutes;c__Clostridia;o__Clostridiales;f__Lachnospiraceae;g__Coprococcus
					OTU3403	p__Firmicutes;c__Clostridia;o__Clostridiales;f__Lachnospiraceae;g__;s__	OTU3876	p__Cyanobacteria;c__4C0d-2;o__YS2;f__;g__;s__	OTU9150	p__Firmicutes;c__Clostridia;o__Clostridiales;f__Ruminococcaceae
					OTU3027	p__Firmicutes;c__Clostridia;o__Clostridiales;f__Lachnospiraceae;g__;s__	OTU29901	p__Tenericutes;c__Mollicutes;o__RF39;f__;g__;s__	OTU9379	p__Firmicutes;c__Clostridia;o__Clostridiales;f__Ruminococcaceae;g__;s__
					OTU4736	p__Firmicutes;c__Clostridia;o__Clostridiales;f__Lachnospiraceae;g__Dorea;s__	OTU29674	p__Tenericutes;c__Mollicutes;o__RF39;f__;g__;s__	OTU17021	p__Bacteroidetes;c__Bacteroidia;o__Bacteroidales;f__Prevotellaceae;g__Prevotella;s__
					OTU7215	p__Firmicutes;c__Clostridia;o__Clostridiales;f__Lachnospiraceae;g__Dorea;s__	OTU29333	p__Tenericutes;c__Mollicutes;o__RF39;f__;g__;s__	OTU19778	p__Spirochaetes;c__Spirochaetes;o__Spirochaetales;f__Spirochaetaceae;g__Treponema;s__
					OTU7216	p__Firmicutes;c__Clostridia;o__Clostridiales;f__Lachnospiraceae;g__Butyrivibrio;s__	OTU29650	p__Tenericutes;c__Mollicutes;o__RF39;f__;g__;s__	OTU1540	p__Firmicutes;c__Clostridia;o__Clostridiales;f__Lachnospiraceae
					OTU6608	p__Firmicutes;c__Clostridia;o__Clostridiales;f__Lachnospiraceae;g__Dorea;s__	OTU30053	p__Tenericutes;c__Mollicutes;o__RF39;f__;g__;s__	OTU2524	p__Firmicutes;c__Clostridia;o__Clostridiales;f__;g__;s__
					OTU10200	p__Firmicutes;c__Clostridia;o__Clostridiales;f__Lachnospiraceae;g__;s__	OTU29975	p__Tenericutes;c__Mollicutes;o__RF39;f__;g__;s__	OTU3153	p__Firmicutes;c__Clostridia;o__Clostridiales
					OTU2121	p__Firmicutes;c__Clostridia;o__Clostridiales;f__Lachnospiraceae	OTU2364	p__Firmicutes;c__Clostridia;o__Clostridiales;f__;g__;s__	OTU6907	p__Firmicutes;c__Clostridia;o__Clostridiales;f__Ruminococcaceae;g__Oscillospira;s__
					OTU3859	p__Firmicutes;c__Clostridia;o__Clostridiales;f__Lachnospiraceae	OTU5463	p__Firmicutes;c__Clostridia;o__Clostridiales;f__;g__;s__	OTU7946	p__Firmicutes;c__Clostridia;o__Clostridiales
					OTU10099	p__Firmicutes;c__Clostridia;o__Clostridiales;f__Lachnospiraceae	OTU1727	p__Firmicutes;c__Clostridia;o__Clostridiales;f__;g__;s__	OTU8571	p__Firmicutes;c__Clostridia;o__Clostridiales;f__Lachnospiraceae
					OTU25727	p__Firmicutes;c__Erysipelotrichi;o__Erysipelotrichales;f__Erysipelotrichaceae;g__Sharpea;s__	OTU3952	p__Firmicutes;c__Clostridia;o__Clostridiales;f__;g__;s__	OTU8811	p__Firmicutes;c__Clostridia;o__Clostridiales;f__Ruminococcaceae;g__;s__
					OTU29227	p__Firmicutes;c__Erysipelotrichi;o__Erysipelotrichales;f__Erysipelotrichaceae	OTU5707	p__Firmicutes;c__Clostridia;o__Clostridiales;f__;g__;s__	OTU9110	p__Firmicutes;c__Clostridia;o__Clostridiales;f__Ruminococcaceae
					OTU29231	p__Firmicutes;c__Erysipelotrichi;o__Erysipelotrichales;f__Erysipelotrichaceae	OTU5801	p__Firmicutes;c__Clostridia;o__Clostridiales;f__;g__;s__	OTU9166	p__Firmicutes;c__Clostridia;o__Clostridiales;f__Ruminococcaceae;g__;s__
					OTU18289	p__Proteobacteria;c__Deltaproteobacteria;o__Desulfovibrionales;f__Desulfovibrionaceae;g__;s__	OTU5615	p__Firmicutes;c__Clostridia;o__Clostridiales;f__;g__;s__	OTU12217	p__Firmicutes;c__Clostridia;o__Clostridiales;f__Ruminococcaceae;g__;s__
					OTU15094	p__Firmicutes;c__Clostridia;o__Clostridiales;f__Christensenellaceae;g__;s__	OTU2552	p__Firmicutes;c__Clostridia;o__Clostridiales;f__;g__;s__	OTU14916	p__Firmicutes;c__Clostridia;o__Clostridiales;f__Ruminococcaceae;g__;s__
					OTU18883	p__Bacteroidetes;c__Bacteroidia;o__Bacteroidales;f__Bacteroidaceae;g__;s__	OTU22208	p__Bacteroidetes;c__Bacteroidia;o__Bacteroidales;f__;g__;s__	OTU15402	p__Firmicutes;c__Clostridia;o__Clostridiales;f__Ruminococcaceae;g__;s__
					OTU18589	p__Bacteroidetes;c__Bacteroidia;o__Bacteroidales;f__Bacteroidaceae;g__;s__	OTU23586	p__Bacteroidetes;c__Bacteroidia;o__Bacteroidales;f__;g__;s__	OTU17197	p__Firmicutes;c__Clostridia;o__Clostridiales;f__Ruminococcaceae;g__;s__
					OTU21113	p__Bacteroidetes;c__Bacteroidia;o__Bacteroidales;f__Bacteroidaceae;g__;s__	OTU18549	p__Bacteroidetes;c__Bacteroidia;o__Bacteroidales;f__;g__;s__	OTU18380	p__Bacteroidetes;c__Bacteroidia;o__Bacteroidales;f__Bacteroidaceae;g__5-7N15;s__
					OTU19140	p__Bacteroidetes;c__Bacteroidia;o__Bacteroidales;f__Bacteroidaceae;g__5-7N15;s__	OTU23740	p__Bacteroidetes;c__Bacteroidia;o__Bacteroidales;f__;g__;s__	OTU19234	p__Firmicutes;c__Clostridia;o__Clostridiales;f__Ruminococcaceae;g__;s__
					OTU21091	p__Bacteroidetes;c__Bacteroidia;o__Bacteroidales;f__Bacteroidaceae;g__;s__	OTU23646	p__Bacteroidetes;c__Bacteroidia;o__Bacteroidales;f__;g__;s__	OTU19893	p__Firmicutes;c__Clostridia;o__Clostridiales
					OTU18535	p__Bacteroidetes;c__Bacteroidia;o__Bacteroidales;f__Bacteroidaceae;g__5-7N15;s__	OTU23600	p__Bacteroidetes;c__Bacteroidia;o__Bacteroidales;f__;g__;s__
					OTU20454	p__Bacteroidetes;c__Bacteroidia;o__Bacteroidales;f__Bacteroidaceae;g__5-7N15;s__	OTU17487	p__Bacteroidetes;c__Bacteroidia;o__Bacteroidales;f__;g__;s__
					OTU21170	p__Bacteroidetes;c__Bacteroidia;o__Bacteroidales;f__Bacteroidaceae;g__;s__	OTU23803	p__Bacteroidetes;c__Bacteroidia;o__Bacteroidales;f__;g__;s__
					OTU19055	p__Bacteroidetes;c__Bacteroidia;o__Bacteroidales;f__[Paraprevotellaceae];g__[Prevotella];s__	OTU23732	p__Bacteroidetes;c__Bacteroidia;o__Bacteroidales;f__;g__;s__
					OTU20199	p__Bacteroidetes;c__Bacteroidia;o__Bacteroidales;f__[Paraprevotellaceae];g__YRC22;s__	OTU21806	p__Bacteroidetes;c__Bacteroidia;o__Bacteroidales;f__;g__;s__
					OTU21256	p__Bacteroidetes;c__Bacteroidia;o__Bacteroidales;f__[Paraprevotellaceae];g__[Prevotella];s__	OTU21316	p__Bacteroidetes;c__Bacteroidia;o__Bacteroidales;f__;g__;s__
					OTU17438	p__Firmicutes;c__Clostridia;o__Clostridiales;f__[Mogibacteriaceae];g__Mogibacterium;s__	OTU23750	p__Bacteroidetes;c__Bacteroidia;o__Bacteroidales;f__;g__;s__
					OTU16732	p__Firmicutes;c__Clostridia;o__Clostridiales;f__[Mogibacteriaceae];g__;s__	OTU21516	p__Bacteroidetes;c__Bacteroidia;o__Bacteroidales;f__;g__;s__
					OTU107	p__Bacteroidetes;c__Bacteroidia;o__Bacteroidales;f__[Barnesiellaceae];g__;s__	OTU17777	p__Bacteroidetes;c__Bacteroidia;o__Bacteroidales;f__;g__;s__
					OTU18460	p__Bacteroidetes;c__Bacteroidia;o__Bacteroidales;f__[Barnesiellaceae];g__;s__	OTU23696	p__Bacteroidetes;c__Bacteroidia;o__Bacteroidales;f__;g__;s__
					OTU18385	p__Proteobacteria;c__Alphaproteobacteria;o__Rickettsiales;f__;g__;s__	OTU21891	p__Bacteroidetes;c__Bacteroidia;o__Bacteroidales;f__;g__;s__
					OTU29250	p__Tenericutes;c__Mollicutes;o__RF39;f__;g__;s__	OTU20856	p__Bacteroidetes;c__Bacteroidia;o__Bacteroidales;f__;g__;s__
					OTU29865	p__Tenericutes;c__Mollicutes;o__RF39;f__;g__;s__	OTU19572	p__Bacteroidetes;c__Bacteroidia;o__Bacteroidales;f__;g__;s__
					OTU29185	p__Tenericutes;c__Mollicutes;o__RF39;f__;g__;s__	OTU21942	p__Bacteroidetes;c__Bacteroidia;o__Bacteroidales;f__;g__;s__
					OTU15377	p__Tenericutes;c__Mollicutes;o__RF39;f__;g__;s__	OTU23777	p__Bacteroidetes;c__Bacteroidia;o__Bacteroidales;f__;g__;s__
					OTU8424	p__Tenericutes;c__Mollicutes;o__RF39;f__;g__;s__	OTU2140	p__Firmicutes;c__Clostridia;o__Clostridiales
					OTU10762	p__Tenericutes;c__Mollicutes;o__RF39;f__;g__;s__	OTU2853	p__Firmicutes;c__Clostridia;o__Clostridiales
					OTU29806	p__Tenericutes;c__Mollicutes;o__RF39;f__;g__;s__	OTU2087	p__Firmicutes;c__Clostridia;o__Clostridiales
					OTU29441	p__Tenericutes;c__Mollicutes;o__RF39;f__;g__;s__	OTU2533	p__Firmicutes;c__Clostridia;o__Clostridiales
					OTU29248	p__Tenericutes;c__Mollicutes;o__RF39;f__;g__;s__	OTU12465	p__Firmicutes;c__Clostridia;o__Clostridiales
					OTU29460	p__Tenericutes;c__Mollicutes;o__RF39;f__;g__;s__	OTU4799	p__Firmicutes;c__Clostridia;o__Clostridiales
					OTU9030	p__Tenericutes;c__Mollicutes;o__RF39;f__;g__;s__	OTU5317	p__Firmicutes;c__Clostridia;o__Clostridiales
					OTU29748	p__Tenericutes;c__Mollicutes;o__RF39;f__;g__;s__	OTU17929	p__Firmicutes;c__Clostridia;o__Clostridiales
					OTU29673	p__Tenericutes;c__Mollicutes;o__RF39;f__;g__;s__	OTU3166	p__Firmicutes;c__Clostridia;o__Clostridiales
					OTU29693	p__Tenericutes;c__Mollicutes;o__RF39;f__;g__;s__	OTU7984	p__Firmicutes;c__Clostridia;o__Clostridiales
					OTU29994	p__Tenericutes;c__Mollicutes;o__RF39;f__;g__;s__	OTU2134	p__Firmicutes;c__Clostridia;o__Clostridiales
					OTU29750	p__Tenericutes;c__Mollicutes;o__RF39;f__;g__;s__	OTU3272	p__Firmicutes;c__Clostridia;o__Clostridiales
					OTU29598	p__Tenericutes;c__Mollicutes;o__RF39;f__;g__;s__	OTU5190	p__Firmicutes;c__Clostridia;o__Clostridiales
					OTU29254	p__Tenericutes;c__Mollicutes;o__RF39;f__;g__;s__	OTU16958	p__Firmicutes;c__Clostridia;o__Clostridiales
					OTU29923	p__Tenericutes;c__Mollicutes;o__RF39;f__;g__;s__	OTU21368	p__Firmicutes;c__Clostridia;o__Clostridiales
					OTU29988	p__Tenericutes;c__Mollicutes;o__RF39;f__;g__;s__	OTU23455	p__Bacteroidetes;c__Bacteroidia;o__Bacteroidales
					OTU29683	p__Tenericutes;c__Mollicutes;o__RF39;f__;g__;s__	OTU23644	p__Bacteroidetes;c__Bacteroidia;o__Bacteroidales
					OTU28971	p__Proteobacteria;c__Alphaproteobacteria;o__RF32;f__;g__;s__	OTU17890	p__Bacteroidetes;c__Bacteroidia;o__Bacteroidales
					OTU28397	p__Tenericutes;c__RF3;o__ML615J-28;f__;g__;s__	OTU5448	p__Proteobacteria;c__Deltaproteobacteria
					OTU14370	p__Tenericutes;c__RF3;o__ML615J-28;f__;g__;s__	OTU4600	p__Proteobacteria
					OTU2254	p__Firmicutes;c__Clostridia;o__Clostridiales;f__;g__;s__	OTU2498	p__Proteobacteria
					OTU3678	p__Firmicutes;c__Clostridia;o__Clostridiales;f__;g__;s__	OTU5015	p__Firmicutes
					OTU4289	p__Firmicutes;c__Clostridia;o__Clostridiales;f__;g__;s__	OTU20870	p__Bacteroidetes
					OTU7941	p__Firmicutes;c__Clostridia;o__Clostridiales;f__;g__;s__	OTU2826	Unclassified bacteria
					OTU4046	p__Bacteroidetes;c__Bacteroidia;o__Bacteroidales;f__;g__;s__
					OTU17859	p__Bacteroidetes;c__Bacteroidia;o__Bacteroidales;f__;g__;s__
					OTU19329	p__Bacteroidetes;c__Bacteroidia;o__Bacteroidales;f__;g__;s__
					OTU14148	p__Bacteroidetes;c__Bacteroidia;o__Bacteroidales;f__;g__;s__
					OTU12147	p__Bacteroidetes;c__Bacteroidia;o__Bacteroidales;f__;g__;s__
					OTU21228	p__Bacteroidetes;c__Bacteroidia;o__Bacteroidales;f__;g__;s__
					OTU21066	p__Bacteroidetes;c__Bacteroidia;o__Bacteroidales;f__;g__;s__
					OTU21287	p__Bacteroidetes;c__Bacteroidia;o__Bacteroidales;f__;g__;s__
					OTU20188	p__Bacteroidetes;c__Bacteroidia;o__Bacteroidales;f__;g__;s__
					OTU20697	p__Bacteroidetes;c__Bacteroidia;o__Bacteroidales;f__;g__;s__
					OTU21371	p__Bacteroidetes;c__Bacteroidia;o__Bacteroidales;f__;g__;s__
					OTU18461	p__Proteobacteria;c__Deltaproteobacteria;o__Desulfovibrionales
					OTU4593	p__Firmicutes;c__Clostridia;o__Clostridiales
					OTU2756	p__Firmicutes;c__Clostridia;o__Clostridiales
					OTU4349	p__Firmicutes;c__Clostridia;o__Clostridiales
					OTU19807	p__Firmicutes;c__Clostridia;o__Clostridiales
					OTU3958	p__Firmicutes;c__Clostridia;o__Clostridiales
					OTU4122	p__Firmicutes;c__Clostridia;o__Clostridiales
					OTU4009	p__Firmicutes;c__Clostridia;o__Clostridiales
					OTU5851	p__Firmicutes;c__Clostridia;o__Clostridiales
					OTU18919	p__Firmicutes;c__Clostridia;o__Clostridiales
					OTU1943	p__Firmicutes;c__Clostridia;o__Clostridiales
					OTU3850	p__Firmicutes;c__Clostridia;o__Clostridiales
					OTU1603	p__Firmicutes;c__Clostridia;o__Clostridiales
					OTU3570	p__Firmicutes;c__Clostridia;o__Clostridiales
					OTU11234	p__Firmicutes;c__Clostridia;o__Clostridiales
					OTU17270	p__Firmicutes;c__Clostridia;o__Clostridiales
					OTU17700	p__Firmicutes;c__Clostridia;o__Clostridiales
					OTU18579	p__Firmicutes;c__Clostridia;o__Clostridiales
					OTU2626	p__Firmicutes;c__Clostridia;o__Clostridiales
					OTU4083	p__Firmicutes;c__Clostridia;o__Clostridiales
					OTU18624	p__Firmicutes;c__Clostridia;o__Clostridiales
					OTU21057	p__Bacteroidetes;c__Bacteroidia;o__Bacteroidales
					OTU21159	p__Bacteroidetes;c__Bacteroidia;o__Bacteroidales
					OTU25704	p__Bacteroidetes;c__Bacteroidia;o__Bacteroidales
					OTU3504	p__Proteobacteria
					OTU3965	p__Proteobacteria

## Sheet: Table S3
Table S3 Pathways of functional prediction.
ID	C.elaphus_1	C.elaphus_2	C.elaphus_3	Elapho.cephalophus_1	Elapho.cephalophus_2	Elapho.cephalophus_3	C.nippon_1	C.nippon_2	C.nippon_3	Elaphu.davidianus_1	Elaphu.davidianus_2	Elaphu.davidianus_3	R.unicolor_1	R.unicolor_2	R.unicolor_3	D.dama_1	D.dama_2	D.dama_3	A.porcinus_1	A.porcinus_2	A.porcinus_3
ko00010; Glycolysis / Gluconeogenesis	0.0081068	0.00808318	0.00819173	0.00994657	0.00872618	0.00862478	0.00792067	0.00834061	0.00793429	0.00837784	0.00830649	0.00810366	0.00808157	0.00797712	0.00801929	0.00817468	0.00838659	0.00848584	0.00844173	0.00920721	0.00793467
ko00020; Citrate cycle (TCA cycle)	0.00468535	0.00460082	0.00488815	0.00451399	0.00492096	0.00493658	0.00449876	0.00455525	0.00443149	0.00459734	0.00462689	0.00469383	0.00452678	0.00458293	0.00471432	0.00462963	0.00463026	0.00467848	0.00477374	0.00441214	0.00470607
ko00030; Pentose phosphate pathway	0.00709507	0.00709573	0.0072075	0.00857079	0.00713153	0.00709887	0.00697517	0.00718808	0.00701327	0.00728805	0.00724351	0.00720528	0.00713887	0.00707076	0.00714792	0.00742376	0.00731978	0.00727136	0.00720649	0.0073892	0.00700139
ko00040; Pentose and glucuronate interconversions	0.00929423	0.00917673	0.00884115	0.00862358	0.00864007	0.00861842	0.00884661	0.00885899	0.00888636	0.00907895	0.00910806	0.0091982	0.00933661	0.00913812	0.00899251	0.00914606	0.00876548	0.0088873	0.00870284	0.00833748	0.00907306
ko00051; Fructose and mannose metabolism	0.018388	0.0182202	0.0191087	0.0179263	0.0197398	0.019592	0.0182693	0.0180274	0.0179613	0.0180616	0.0183552	0.0182791	0.0186473	0.0179288	0.0175329	0.0177846	0.0178855	0.0184067	0.0193459	0.0188673	0.0187213
ko00052; Galactose metabolism	0.00885309	0.00835991	0.0102456	0.0105147	0.0099881	0.00970949	0.00829919	0.00884277	0.00808536	0.00852942	0.00879117	0.0089651	0.00895557	0.00837326	0.00829721	0.00950305	0.00931066	0.00912839	0.01056	0.00996619	0.00852305
ko00053; Ascorbate and aldarate metabolism	0.00127596	0.00134668	0.00118257	0.00138485	0.00127152	0.0012834	0.00125223	0.00125122	0.00124919	0.00145242	0.00138995	0.00135947	0.00132549	0.00122765	0.00127669	0.00122694	0.0012683	0.00133873	0.00119124	0.00134523	0.00132804
ko00061; Fatty acid biosynthesis	0.00596352	0.00587216	0.00642777	0.00632645	0.00630318	0.00632768	0.0061034	0.00579245	0.00602793	0.00589771	0.0060935	0.0060814	0.00590007	0.0059983	0.006006	0.00622409	0.00602875	0.00595614	0.00632751	0.00644416	0.00609438
ko00062; Fatty acid elongation	4.08491e-06	4.49396e-06	2.52848e-06	1.00219e-05	5.86722e-06	5.69074e-06	4.75195e-06	5.34915e-06	5.23355e-06	6.6516e-06	5.45449e-06	4.17549e-06	3.77804e-06	3.372e-06	3.44461e-06	4.36133e-06	5.87883e-06	5.82899e-06	2.99149e-06	9.52633e-06	3.71819e-06
ko00071; Fatty acid metabolism	0.00182558	0.0018361	0.00182392	0.00179036	0.00187174	0.00189281	0.00184254	0.00177509	0.00183245	0.00181895	0.00184247	0.00182968	0.00177097	0.00183227	0.00184695	0.00182576	0.00181048	0.00180808	0.00178222	0.00165719	0.0018706
ko00072; Synthesis and degradation of ketone bodies	0.00030505	0.000314776	0.000244561	0.0003354	0.000262751	0.000276597	0.00030302	0.000273609	0.000305577	0.000341083	0.000330417	0.000319982	0.000291156	0.000322509	0.000338297	0.000278233	0.000264992	0.000285421	0.000226754	0.000285625	0.000321831
ko00100; Steroid biosynthesis	3.08672e-06	3.22297e-06	2.70444e-06	6.45458e-06	3.43352e-06	3.82795e-06	2.25269e-06	1.89882e-06	2.19025e-06	4.67374e-06	6.6312e-06	4.98809e-06	3.07459e-06	2.75648e-06	2.15895e-06	3.06919e-06	2.04346e-06	2.84955e-06	2.83642e-06	8.70472e-06	3.45161e-06
ko00120; Primary bile acid biosynthesis	0.000337114	0.00032009	0.000360265	0.000444829	0.000283099	0.000284523	0.000309794	0.000313268	0.000295725	0.000388922	0.000375302	0.000402544	0.000388953	0.000340141	0.00035226	0.000385529	0.000336228	0.000331247	0.000323599	0.00029109	0.000332171
ko00121; Secondary bile acid biosynthesis	0.00031886	0.000301656	0.000348068	0.000435373	0.000273032	0.000272955	0.000292147	0.000300084	0.000278183	0.000368862	0.000356001	0.000383578	0.000372165	0.00032088	0.000332265	0.000368817	0.000322975	0.000315956	0.000316083	0.000280639	0.000313813
ko00130; Ubiquinone and other terpenoid-quinone biosynthesis	0.00372239	0.00354127	0.00413832	0.00438551	0.00432397	0.00432254	0.00358307	0.00350526	0.00343795	0.00345146	0.00370253	0.00376608	0.00368407	0.0036555	0.00361956	0.0037521	0.00365131	0.00373395	0.00407351	0.00369256	0.00367116
ko00140; Steroid hormone biosynthesis	0.000701487	0.000646744	0.000852636	0.000583345	0.000742938	0.000729181	0.000644921	0.000552109	0.000572563	0.000703236	0.000691997	0.000795509	0.000742065	0.00065691	0.000676433	0.000775171	0.000630018	0.000573985	0.000778095	0.000307826	0.00073873
ko00190; Oxidative phosphorylation	0.014709	0.0146724	0.0148221	0.0144426	0.014949	0.0149564	0.0143403	0.0146056	0.014249	0.0142075	0.0143827	0.0147457	0.0149554	0.0145174	0.0143508	0.0144988	0.0145059	0.0147421	0.0151259	0.0142801	0.0145351
ko00195; Photosynthesis	0.00240977	0.00237052	0.00224385	0.00314884	0.00267611	0.00261579	0.00216001	0.00258811	0.00214967	0.00234176	0.00239593	0.00231651	0.00245054	0.00218111	0.00212999	0.00203866	0.00233079	0.00267551	0.00252707	0.00310477	0.00230344
ko00196; Photosynthesis - antenna proteins	1.63279e-06	3.19442e-06	4.64306e-06	2.19578e-07	2.74151e-06	1.91879e-06	2.56712e-06	6.56806e-06	3.5904e-06	1.2473e-06	1.66194e-07	1.43877e-06	2.6769e-06	2.14289e-06	2.1496e-06	5.65164e-06	6.97721e-06	3.52661e-06	7.77195e-06	1.61713e-07	1.49047e-06
ko00230; Purine metabolism	0.0359082	0.0357771	0.0365928	0.038545	0.0371079	0.03692	0.0356833	0.0372176	0.0358988	0.0355107	0.0357121	0.0352204	0.0352564	0.0357271	0.035916	0.0360217	0.0370538	0.0371997	0.037304	0.0390762	0.0354564
ko00232; Caffeine metabolism	1.83521e-05	2.21171e-05	1.37734e-05	1.71705e-05	1.55965e-05	1.68515e-05	1.83831e-05	1.59754e-05	1.86042e-05	2.11873e-05	2.09315e-05	2.10346e-05	1.86933e-05	1.98172e-05	2.06647e-05	1.70035e-05	1.52999e-05	1.72809e-05	1.60569e-05	1.44865e-05	2.28516e-05
ko00240; Pyrimidine metabolism	0.0293123	0.02918	0.0292076	0.0293678	0.0289683	0.0290032	0.028747	0.0300814	0.028927	0.0288666	0.0290526	0.0294008	0.0299775	0.0292554	0.0291922	0.028887	0.0298571	0.0302455	0.0293853	0.0296047	0.0282485
ko00250; Alanine, aspartate and glutamate metabolism	0.0146329	0.0144424	0.0142324	0.0137928	0.0139232	0.0140024	0.0140371	0.0144205	0.01397	0.0145427	0.0146072	0.0150729	0.0154511	0.0145733	0.014474	0.0140499	0.0142509	0.0146444	0.0140201	0.0133235	0.0141683
ko00253; Tetracycline biosynthesis	0.000199476	0.00021165	0.00018776	0.000284421	0.00019815	0.000196717	0.000198011	0.000223425	0.00020782	0.000224308	0.000210442	0.000204526	0.000204561	0.000211896	0.000218311	0.000215307	0.00022091	0.000211698	0.000211294	0.000238775	0.000200925
ko00260; Glycine, serine and threonine metabolism	0.0135261	0.0135345	0.0132957	0.0119353	0.0131252	0.0132259	0.0132249	0.0129892	0.013145	0.0134793	0.0134052	0.0137098	0.0134178	0.013528	0.0136987	0.0134742	0.0132437	0.0133261	0.012826	0.0118138	0.0134529
ko00270; Cysteine and methionine metabolism	0.0145179	0.0143076	0.0140326	0.0133973	0.0136558	0.0138839	0.0147266	0.0137802	0.0146783	0.0145777	0.0146031	0.0144772	0.014026	0.0148545	0.0150574	0.0143176	0.0139164	0.0139335	0.0131153	0.0138493	0.0146453
ko00280; Valine, leucine and isoleucine degradation	0.00465931	0.00463448	0.00429663	0.00376539	0.00423593	0.00440078	0.00471348	0.00397729	0.00461943	0.00477402	0.00476976	0.0048016	0.00446131	0.00482615	0.00493026	0.00442904	0.00406226	0.00418875	0.00373609	0.00352639	0.00488469
ko00281; Geraniol degradation	0.00133159	0.0013427	0.00118394	0.00120083	0.00121853	0.00127605	0.00127374	0.00114575	0.00125832	0.00139427	0.00139294	0.00139107	0.00125742	0.00135873	0.00141038	0.00122937	0.00113946	0.00122672	0.00108139	0.00104874	0.00139759
ko00290; Valine, leucine and isoleucine biosynthesis	0.00523698	0.00531551	0.00500937	0.00457859	0.00479229	0.00483871	0.00541506	0.00512121	0.00539405	0.00542996	0.00529817	0.00540954	0.00536057	0.00528345	0.00536613	0.00522424	0.00512786	0.00504771	0.00486615	0.00507569	0.00540518
ko00300; Lysine biosynthesis	0.0113193	0.0111921	0.0111443	0.011784	0.0109968	0.0111034	0.0114333	0.0110021	0.0113943	0.0114628	0.01147	0.0113333	0.0111183	0.0114231	0.011575	0.0111334	0.0110626	0.0111687	0.0106713	0.0111902	0.011442
ko00310; Lysine degradation	0.00290744	0.00288214	0.00317297	0.00285912	0.00306729	0.00307547	0.00286835	0.00273015	0.00276806	0.00305417	0.00303537	0.00315657	0.00302023	0.00291999	0.0029625	0.00307772	0.00289219	0.00281602	0.00305311	0.00246255	0.00299327
ko00311; Penicillin and cephalosporin biosynthesis	0.00080883	0.000809242	0.00076941	0.000693234	0.000750554	0.000778502	0.000866301	0.000672334	0.000857869	0.00080298	0.000827645	0.000827028	0.000761504	0.000831447	0.000831534	0.000796012	0.000702147	0.000695822	0.000682185	0.000674445	0.000858514
ko00312; beta-Lactam resistance	0.00177689	0.00173474	0.00142838	0.00146044	0.00151405	0.00158598	0.0018493	0.00144252	0.00184181	0.00183077	0.00182116	0.00173942	0.00162913	0.00186362	0.00187125	0.00156514	0.00142043	0.00149406	0.00111669	0.00131617	0.00182366
ko00330; Arginine and proline metabolism	0.0205593	0.0205453	0.0187951	0.0175591	0.01817	0.018554	0.0199655	0.019515	0.0198956	0.0208193	0.0206079	0.0214997	0.0217165	0.0208286	0.0208495	0.0195563	0.0193289	0.0198216	0.0178358	0.016457	0.0199531
ko00331; Clavulanic acid biosynthesis	3.70492e-07	4.08245e-07	2.31952e-07	1.02649e-06	6.1362e-07	6.15946e-07	3.35496e-07	2.69811e-07	3.31307e-07	4.10982e-07	6.06055e-07	3.72396e-07	3.60307e-07	3.32423e-07	2.71577e-07	2.82412e-07	2.25707e-07	3.32203e-07	3.00175e-07	1.97537e-07	4.83436e-07
ko00340; Histidine metabolism	0.0105976	0.0104337	0.010396	0.00917937	0.00993515	0.0100454	0.0104202	0.00993954	0.010343	0.010629	0.0105941	0.0107999	0.0104789	0.0105666	0.0107535	0.0104687	0.0100748	0.0100525	0.00985632	0.00934894	0.010589
ko00350; Tyrosine metabolism	0.00539292	0.00537718	0.00493628	0.00530523	0.00491653	0.00500031	0.00528536	0.00510252	0.00528677	0.00547891	0.00546549	0.0055013	0.00540917	0.005479	0.00551087	0.00519063	0.005052	0.00520984	0.00468326	0.00474063	0.00531084
ko00351; DDT degradation	9.21816e-05	9.18458e-05	7.57106e-05	5.60719e-05	7.28135e-05	7.71101e-05	9.62747e-05	7.98391e-05	9.54896e-05	9.39353e-05	9.23906e-05	9.1684e-05	8.34073e-05	9.74485e-05	0.000101674	8.47359e-05	7.91196e-05	7.94006e-05	6.1766e-05	5.78762e-05	9.50522e-05
ko00360; Phenylalanine metabolism	0.00493904	0.00501802	0.00442735	0.00377895	0.00428766	0.00446597	0.00509413	0.0044696	0.00511184	0.00510264	0.00498295	0.00499713	0.00472691	0.00510591	0.00524877	0.00470174	0.00444986	0.00447649	0.003944	0.00381304	0.00519776
ko00361; Chlorocyclohexane and chlorobenzene degradation	0.000435292	0.000459172	0.000429692	0.000458955	0.000433847	0.000439898	0.000446615	0.000436187	0.000448858	0.000474574	0.000456868	0.000465989	0.000449707	0.000445708	0.000458318	0.000459333	0.000448844	0.000435668	0.000432139	0.000389813	0.000466501
ko00362; Benzoate degradation	0.0048379	0.00484684	0.00434727	0.00416765	0.00419186	0.00430226	0.00478752	0.0044597	0.00476814	0.00504076	0.00487896	0.00496268	0.00473097	0.00490765	0.00505808	0.0046387	0.00441223	0.00449027	0.00399858	0.00387607	0.00492728
ko00363; Bisphenol degradation	0.00173189	0.00174789	0.00174096	0.00196407	0.001768	0.00176932	0.00168856	0.00171818	0.00166929	0.00183502	0.00179748	0.00180753	0.00178961	0.0017168	0.00175176	0.00171173	0.00170755	0.00172076	0.00172831	0.00154904	0.00178615
ko00364; Fluorobenzoate degradation	9.75425e-05	0.000101417	8.65051e-05	7.93558e-05	8.97527e-05	9.39305e-05	9.38475e-05	8.14965e-05	9.3502e-05	0.000100386	9.84007e-05	0.000101458	9.08006e-05	9.96499e-05	0.000104545	9.3163e-05	8.27257e-05	8.33906e-05	7.89295e-05	5.08749e-05	0.000106558
ko00380; Tryptophan metabolism	0.000489316	0.000517343	0.000474943	0.000705576	0.000570611	0.000568642	0.000510431	0.000456301	0.000490324	0.000514169	0.000522007	0.000526669	0.000480369	0.000488923	0.000491974	0.000517934	0.000476687	0.000467825	0.00050122	0.000418175	0.000524516
ko00400; Phenylalanine, tyrosine and tryptophan biosynthesis	0.0129088	0.0128973	0.0123299	0.0111541	0.0125497	0.0126076	0.0130755	0.0127427	0.013077	0.0126625	0.0126612	0.0127593	0.0126922	0.0127929	0.0127815	0.0124496	0.012487	0.0127488	0.012137	0.0132482	0.0129547
ko00401; Novobiocin biosynthesis	0.000798567	0.000801401	0.00075853	0.000754791	0.000770241	0.0007825	0.000837472	0.000767261	0.000834075	0.000800111	0.000801064	0.000798031	0.0007843	0.00080981	0.00080878	0.00077316	0.000760854	0.000776173	0.000731313	0.000843473	0.000823407
ko00410; beta-Alanine metabolism	0.00106176	0.00108151	0.000977516	0.00102467	0.000997736	0.00102544	0.00102273	0.00100328	0.00101146	0.00109252	0.00109303	0.00112616	0.00112891	0.00106677	0.00106747	0.000971644	0.000973459	0.0010441	0.000968428	0.000930511	0.00108372
ko00430; Taurine and hypotaurine metabolism	0.000851548	0.000858857	0.000887359	0.000890697	0.000882619	0.000889483	0.000820065	0.000823742	0.00081134	0.000872472	0.000856524	0.000890061	0.000851983	0.000834672	0.000862526	0.000875686	0.000851316	0.000846984	0.000871289	0.000716597	0.000875667
ko00440; Phosphonate and phosphinate metabolism	0.00124017	0.0013046	0.00126643	0.00115227	0.00121918	0.00120314	0.00125465	0.00128955	0.00125999	0.00130037	0.00122267	0.00125635	0.00125744	0.00128199	0.00132221	0.0012971	0.00130296	0.00121601	0.00130271	0.000908427	0.00135331
ko00450; Selenocompound metabolism	0.00561519	0.00562235	0.00541234	0.00552933	0.00540066	0.00542744	0.0056387	0.00571395	0.00569212	0.00568724	0.00559545	0.00551887	0.00547515	0.00568329	0.0057554	0.00560509	0.00565183	0.00563656	0.00538067	0.00580051	0.00559768
ko00460; Cyanoamino acid metabolism	0.00260743	0.00243945	0.00292488	0.00244239	0.00272532	0.00271098	0.00243803	0.00236486	0.00235711	0.00249823	0.00258026	0.00266377	0.00259569	0.00251954	0.00250929	0.00271306	0.00251243	0.00245941	0.00280423	0.00236673	0.00256861
ko00471; D-Glutamine and D-glutamate metabolism	0.00206716	0.00205304	0.00211495	0.00211286	0.00210537	0.0020989	0.00205856	0.00213237	0.0020716	0.00202544	0.00204166	0.00203577	0.0020219	0.0020404	0.00206144	0.00207881	0.00212897	0.00212873	0.00212081	0.00216408	0.00203943
ko00472; D-Arginine and D-ornithine metabolism	7.83046e-06	1.0472e-05	6.69984e-06	2.20551e-05	1.17258e-05	1.14253e-05	7.22059e-06	9.85156e-06	7.9221e-06	1.00337e-05	9.34237e-06	8.30082e-06	8.40993e-06	7.05135e-06	7.07551e-06	9.16872e-06	9.97063e-06	1.02971e-05	1.0629e-05	1.42878e-05	8.83818e-06
ko00473; D-Alanine metabolism	0.00346893	0.00348757	0.00337754	0.00410655	0.0035536	0.00350682	0.00348597	0.00376186	0.00356073	0.00347519	0.00347628	0.00338672	0.00345488	0.00343092	0.00341478	0.00349763	0.00368083	0.00370498	0.00355959	0.00409856	0.0033388
ko00480; Glutathione metabolism	0.00417296	0.0042597	0.00435456	0.00542214	0.00448446	0.00449647	0.00418587	0.00432117	0.00418983	0.00438394	0.00437614	0.00422371	0.00413934	0.00417189	0.0042944	0.00412101	0.00429538	0.00443388	0.00446647	0.00483688	0.00441848
ko00500; Starch and sucrose metabolism	0.0318416	0.0317845	0.0322215	0.0306069	0.0326812	0.0330356	0.0347717	0.0306763	0.0345632	0.0300957	0.0314972	0.0309182	0.0318651	0.0323914	0.0307199	0.030606	0.029873	0.0304958	0.031856	0.0348503	0.0336476
ko00510; N-Glycan biosynthesis	0.00138705	0.00134364	0.00148068	0.00134455	0.00147391	0.00146012	0.00128989	0.00135745	0.00124992	0.00136276	0.00139527	0.00141719	0.00144601	0.00129486	0.00127899	0.00134864	0.00136456	0.00142881	0.00149299	0.00150257	0.00136631
ko00511; Other glycan degradation	0.00664178	0.00583087	0.00833612	0.00721594	0.00801135	0.00773677	0.00586731	0.00587524	0.00543611	0.00590681	0.00632505	0.006733	0.00646865	0.00596394	0.00590021	0.00725689	0.0066268	0.00645042	0.00825503	0.00654357	0.00615123
ko00513; Various types of N-glycan biosynthesis	3.43537e-07	5.61211e-07	7.00219e-08	2.27102e-06	1.42188e-07	1.80934e-07	2.27478e-07	3.36291e-09	1.45561e-07	2.42959e-07	8.73213e-08	2.92737e-07	2.24752e-07	5.51693e-07	9.91643e-07	1.81604e-09	1.39573e-07	3.70953e-07	8.23399e-08	2.1027e-09	1.7804e-06
ko00520; Amino sugar and nucleotide sugar metabolism	0.0265146	0.0260477	0.0276203	0.0262605	0.0277912	0.0277184	0.0267303	0.0255505	0.0263057	0.0261734	0.0265948	0.0263847	0.0265597	0.0260861	0.0256737	0.0259951	0.0257018	0.0260101	0.0272553	0.0271188	0.0271571
ko00521; Streptomycin biosynthesis	0.00262624	0.00254337	0.00297627	0.00257034	0.00284498	0.00277477	0.00241264	0.00267046	0.00236359	0.00250672	0.00254411	0.00268173	0.00269956	0.00243879	0.00242782	0.00279795	0.00276936	0.00273759	0.00304991	0.00257269	0.00249422
ko00522; Biosynthesis of 12-, 14- and 16-membered macrolides	0.000134188	0.000140173	9.61502e-05	0.000159505	0.000136376	0.00014637	0.000155299	0.000100176	0.000151823	0.00014305	0.000174723	0.00013819	0.000125485	0.000141262	0.000124744	0.000111513	9.62248e-05	0.000109012	8.36282e-05	9.10551e-05	0.00016148
ko00523; Polyketide sugar unit biosynthesis	0.00177834	0.00170738	0.00196589	0.00163928	0.001852	0.00179989	0.00159883	0.00179284	0.00157133	0.00165734	0.00167235	0.00178945	0.00182332	0.00162112	0.00160594	0.00184573	0.00181838	0.00181285	0.00201639	0.00164743	0.00167602
ko00524; Butirosin and neomycin biosynthesis	0.000286404	0.000277677	0.00030903	0.000294286	0.000292736	0.000289915	0.000281409	0.000275423	0.00027272	0.000305579	0.000304877	0.000311401	0.000300318	0.000281721	0.000285361	0.000314701	0.000297965	0.000288746	0.000294294	0.000295302	0.000275989
ko00531; Glycosaminoglycan degradation	0.00193157	0.0016599	0.00241556	0.00132118	0.0021741	0.00207822	0.00168812	0.00147428	0.00144426	0.00183897	0.00186846	0.00214145	0.0019758	0.00170814	0.00173873	0.00213926	0.001763	0.00166079	0.00219568	0.00110702	0.00180967
ko00532; Glycosaminoglycan biosynthesis - chondroitin sulfate	0.000298988	0.000281695	0.000340595	0.000297943	0.000338469	0.000328126	0.000269301	0.000299884	0.00025371	0.000291582	0.000296599	0.00030504	0.000309195	0.000278298	0.000280864	0.000295419	0.000304134	0.000312472	0.000349487	0.000312788	0.000295106
ko00540; Lipopolysaccharide biosynthesis	0.00436283	0.00395589	0.00557842	0.00413005	0.00553747	0.00539593	0.00359148	0.00411087	0.00325324	0.00386856	0.00415956	0.00431807	0.00404964	0.00374148	0.00399711	0.00425485	0.00444903	0.00464854	0.00559344	0.00463933	0.00427077
ko00550; Peptidoglycan biosynthesis	0.0176446	0.0176115	0.0179746	0.0193216	0.0186907	0.0186311	0.0182327	0.0181522	0.0183004	0.0174997	0.017832	0.0171675	0.0171585	0.0177699	0.0176364	0.017646	0.0181337	0.0182103	0.0182721	0.0205658	0.0176496
ko00561; Glycerolipid metabolism	0.00480772	0.0048755	0.00460624	0.00686223	0.00480888	0.00481809	0.00502391	0.00484299	0.00506062	0.0050481	0.00498356	0.00477715	0.00478131	0.00494568	0.00493857	0.00481249	0.00474503	0.00484457	0.00453052	0.00506876	0.00491937
ko00562; Inositol phosphate metabolism	0.0016043	0.00166514	0.00175488	0.00195452	0.00184598	0.00181391	0.0015387	0.00170237	0.00150242	0.00171938	0.00168709	0.00170251	0.0017246	0.00155496	0.00156423	0.00169862	0.00174186	0.00175021	0.0018721	0.00162261	0.00163197
ko00563; Glycosylphosphatidylinositol(GPI)-anchor biosynthesis	1.71817e-06	5.82415e-08	1.74736e-06	5.79169e-08	2.65121e-07	4.72066e-07	1.37601e-09	4.91476e-07	1.32042e-09	1.51121e-06	6.4257e-06	1.76316e-06	1.1837e-06	1.3769e-06	7.35338e-07	5.4883e-07	7.73163e-07	2.10776e-06	5.84609e-08	6.806e-09	7.77817e-08
ko00564; Glycerophospholipid metabolism	0.00787285	0.00772595	0.00797908	0.00941617	0.00789616	0.00782562	0.00755585	0.00786242	0.00755874	0.00794021	0.00795863	0.00797356	0.00782188	0.00776346	0.00779386	0.00834127	0.0080586	0.00803978	0.00809848	0.00843802	0.00748489
ko00565; Ether lipid metabolism	0.000131488	0.000137344	0.000140363	0.00012236	0.000146122	0.000136346	0.000155026	0.000127797	0.000141524	0.000147949	0.000136352	0.000136588	0.000137705	0.000129158	0.000125623	0.000148383	0.000139772	0.000134139	0.000137935	0.000125196	0.000143358
ko00590; Arachidonic acid metabolism	0.000306594	0.000289079	0.000325888	0.000329928	0.000382856	0.000384487	0.000259832	0.000312406	0.000263434	0.000266782	0.000290381	0.000263418	0.000253992	0.000291616	0.000300464	0.000270606	0.00031321	0.000342359	0.000329049	0.00035648	0.000281396
ko00591; Linoleic acid metabolism	0.00112372	0.00112026	0.00112966	0.00125617	0.00114308	0.00114355	0.00109275	0.00109695	0.00107284	0.00117438	0.00116484	0.00117002	0.00116098	0.00111039	0.00113032	0.00108965	0.0010887	0.00111328	0.00110135	0.00099578	0.0011503
ko00592; alpha-Linolenic acid metabolism	4.259e-05	4.38534e-05	4.34217e-05	4.00884e-05	3.92901e-05	4.05156e-05	4.03595e-05	4.57152e-05	3.72549e-05	5.8831e-05	5.56386e-05	5.56763e-05	5.47247e-05	4.64238e-05	4.95081e-05	4.25038e-05	4.51445e-05	4.70239e-05	3.87911e-05	3.74823e-05	4.76048e-05
ko00600; Sphingolipid metabolism	0.00322495	0.00295213	0.00376654	0.0030769	0.0035577	0.00342567	0.00294026	0.00290279	0.00270955	0.00308534	0.00313388	0.00338531	0.00336903	0.00295068	0.0029168	0.00333449	0.00306639	0.00299374	0.00370334	0.00254151	0.00320472
ko00601; Glycosphingolipid biosynthesis - lacto and neolacto series	0.000272835	0.000268184	0.000220989	0.000123412	0.00020904	0.000200871	0.000224796	0.000250124	0.000222376	0.000247694	0.000228896	0.000289434	0.000301897	0.000232551	0.000220126	0.000254418	0.000226593	0.000243333	0.000215567	7.99882e-05	0.000227455
ko00603; Glycosphingolipid biosynthesis - globo series	0.00110275	0.0010097	0.00123791	0.000923709	0.00107997	0.00105133	0.00104705	0.000945245	0.000980943	0.00102192	0.00104794	0.00117185	0.00114231	0.00103313	0.00100824	0.00119588	0.00101987	0.000967562	0.00117425	0.000830889	0.00106095
ko00604; Glycosphingolipid biosynthesis - ganglio series	0.000516331	0.000443659	0.000637395	0.000311768	0.000498786	0.00048902	0.000489288	0.000359645	0.0004343	0.000469667	0.00048725	0.00058151	0.00051993	0.000481382	0.000481587	0.000614938	0.000454396	0.000398226	0.000545177	0.000286838	0.000482684
ko00620; Pyruvate metabolism	0.0115066	0.0114299	0.0113605	0.0112296	0.0113392	0.0113873	0.0112177	0.0110975	0.0111034	0.0117061	0.011583	0.0116937	0.0113918	0.0114433	0.0116684	0.0113757	0.0111579	0.0112539	0.0110388	0.0104385	0.0115574
ko00621; Dioxin degradation	0.000426919	0.000443563	0.000336787	0.000432634	0.00035801	0.000368227	0.000434994	0.000404206	0.000444117	0.000447519	0.000433757	0.00043058	0.000432313	0.000440129	0.000438128	0.000387322	0.000380374	0.000399994	0.000323009	0.000348357	0.000433544
ko00622; Xylene degradation	0.00040826	0.000426856	0.000327324	0.000433747	0.000351437	0.000360644	0.000417608	0.000393803	0.000427254	0.000428954	0.000415854	0.000411038	0.000412487	0.000420467	0.00041963	0.000373685	0.000369979	0.000386478	0.00032004	0.000344508	0.000418395
ko00623; Toluene degradation	0.000494817	0.000488639	0.000530829	0.000557195	0.000547335	0.000552977	0.000461818	0.000501013	0.000454964	0.000507089	0.000514484	0.000516699	0.000503943	0.000486795	0.000499029	0.000508516	0.00051276	0.00051564	0.000549423	0.000525871	0.000495422
ko00624; Polycyclic aromatic hydrocarbon degradation	0.00230589	0.00232355	0.00216937	0.00248446	0.00217693	0.00219548	0.00224736	0.00231002	0.00226223	0.00236697	0.00237817	0.00237354	0.00242775	0.00232588	0.00230532	0.00221722	0.00225487	0.00234034	0.00219982	0.00234201	0.00225978
ko00625; Chloroalkane and chloroalkene degradation	0.00237593	0.00244169	0.00230953	0.00244229	0.00236127	0.00237199	0.00248074	0.00233461	0.00247696	0.00246151	0.00244929	0.00239277	0.00241157	0.00239968	0.0023872	0.00232703	0.0023161	0.00230473	0.00230606	0.0021857	0.00253826
ko00626; Naphthalene degradation	0.00115128	0.00117224	0.00101542	0.001143	0.00104644	0.00107417	0.00114443	0.00107505	0.00114486	0.00122663	0.00119165	0.00117723	0.00112663	0.00117818	0.00121239	0.00107437	0.00104802	0.00109075	0.000962131	0.000986946	0.00120096
ko00627; Aminobenzoate degradation	0.00255646	0.00253398	0.00246583	0.00282193	0.0024902	0.00251818	0.00242121	0.00241264	0.00240313	0.0026625	0.00262201	0.00269608	0.00257968	0.00253785	0.00259406	0.0025815	0.00245533	0.00249416	0.0023678	0.00226336	0.00250242
ko00630; Glyoxylate and dicarboxylate metabolism	0.00693261	0.00704138	0.0069171	0.00731778	0.00713814	0.00715585	0.00680501	0.00696749	0.00676431	0.00701317	0.00700728	0.00697995	0.00687138	0.00689395	0.00701507	0.0068348	0.00692795	0.00707986	0.00706678	0.00711764	0.00719947
ko00633; Nitrotoluene degradation	0.00143901	0.0014484	0.00128302	0.00115986	0.00130949	0.00132219	0.00150419	0.00130466	0.00146137	0.00155741	0.0014963	0.00147677	0.00142797	0.00149096	0.00150912	0.00139545	0.00133714	0.00133227	0.00114104	0.00114014	0.00149882
ko00640; Propanoate metabolism	0.00368785	0.00365891	0.0036385	0.00394357	0.0037422	0.00377004	0.00363766	0.00352983	0.00358788	0.00379992	0.003806	0.00375543	0.00365388	0.00371491	0.00375977	0.00360371	0.00353368	0.00360096	0.00358233	0.00373365	0.0037938
ko00642; Ethylbenzene degradation	0.00101412	0.000988914	0.000924126	0.000999067	0.000933775	0.000943246	0.000949606	0.000928396	0.000937309	0.0010296	0.00101166	0.00105297	0.00102363	0.0010037	0.00100729	0.000983554	0.000923263	0.000964811	0.000867044	0.000851593	0.000973176
ko00643; Styrene degradation	0.000296639	0.000310669	0.000231279	0.000257701	0.000241084	0.000261186	0.000295784	0.000254167	0.000298156	0.000320017	0.000310117	0.000310478	0.000273823	0.000313459	0.000334994	0.000262276	0.00024569	0.000264588	0.000197606	0.000203932	0.000322518
ko00650; Butanoate metabolism	0.00697027	0.0069238	0.00680908	0.00647094	0.00675395	0.00686734	0.00687818	0.00656911	0.00683738	0.00707222	0.00703309	0.00704093	0.00677209	0.00705106	0.00720309	0.00684383	0.00665633	0.00672904	0.00647154	0.00623463	0.00707294
ko00660; C5-Branched dibasic acid metabolism	0.00135226	0.00143394	0.00159646	0.00141425	0.00155488	0.0014843	0.00142803	0.00169336	0.00149367	0.00131355	0.00126096	0.00128673	0.00133164	0.00135042	0.00137653	0.00160793	0.00172499	0.00151623	0.00179422	0.00158654	0.0013418
ko00670; One carbon pool by folate	0.00592357	0.00578129	0.00612558	0.00544132	0.00601382	0.00601038	0.00582521	0.00578724	0.00579307	0.00574733	0.00582076	0.00583918	0.00569825	0.00587629	0.005936	0.00598589	0.00592257	0.00589243	0.00593536	0.00578526	0.00579211
ko00680; Methane metabolism	0.0181516	0.0182754	0.0172771	0.0141995	0.0158599	0.0161464	0.0184133	0.0174069	0.0184984	0.0183376	0.017928	0.0182937	0.0182488	0.0185434	0.0185621	0.0183424	0.0175916	0.0174371	0.0161159	0.01518	0.0181551
ko00710; Carbon fixation in photosynthetic organisms	0.00425447	0.00423029	0.00441942	0.0043516	0.00442658	0.00438059	0.00411213	0.00442382	0.00412617	0.00413963	0.00418381	0.00424004	0.00427825	0.00416525	0.00415207	0.00437228	0.00446342	0.00447338	0.00454583	0.00443716	0.00407377
ko00720; Carbon fixation pathways in prokaryotes	0.0112069	0.0109598	0.0107502	0.00918419	0.0105808	0.0107439	0.0109006	0.0104906	0.0108237	0.0110372	0.0110298	0.0111168	0.0107121	0.0111755	0.01141	0.0107346	0.0105026	0.0107173	0.0100016	0.00975581	0.0111162
ko00730; Thiamine metabolism	0.00898646	0.00894342	0.00818564	0.00833926	0.00832911	0.00841639	0.00867617	0.00894354	0.00870754	0.00886839	0.00889909	0.00904	0.00936452	0.00890594	0.00881522	0.00817952	0.0085669	0.00912214	0.00812493	0.00872619	0.00861266
ko00740; Riboflavin metabolism	0.00360495	0.00349274	0.00382845	0.00396297	0.00395232	0.00395141	0.00350754	0.00352061	0.00345234	0.00344563	0.00359607	0.00350758	0.00343651	0.00355347	0.00356962	0.00348178	0.00352148	0.00365584	0.00381585	0.00394011	0.00360832
ko00750; Vitamin B6 metabolism	0.00426329	0.00419878	0.00420708	0.00332998	0.00399258	0.00401175	0.0039797	0.00416205	0.00395666	0.00416404	0.00416505	0.00443026	0.00454946	0.00418536	0.00417188	0.00416542	0.00422202	0.0042679	0.00407637	0.00341404	0.00400292
ko00760; Nicotinate and nicotinamide metabolism	0.00765827	0.00762438	0.00790152	0.008149	0.00788928	0.00788539	0.00764212	0.00802602	0.00771638	0.00746109	0.00762064	0.00757685	0.00768813	0.00767839	0.00765882	0.00773896	0.00804451	0.00805462	0.00806844	0.00841117	0.00746954
ko00770; Pantothenate and CoA biosynthesis	0.00805252	0.00800192	0.0077757	0.00791562	0.00776883	0.00782515	0.00783729	0.00797391	0.00781081	0.00804801	0.00807149	0.00820809	0.00832142	0.00798314	0.00798435	0.00768509	0.00782599	0.0080879	0.00767052	0.00778686	0.00788806
ko00780; Biotin metabolism	0.00466294	0.00466798	0.00494218	0.00418289	0.00474626	0.00476345	0.00468807	0.00450169	0.00456933	0.00475984	0.0047101	0.00490443	0.00490209	0.00462988	0.00466696	0.00460017	0.00455784	0.00455141	0.00478576	0.00399298	0.00486349
ko00785; Lipoic acid metabolism	0.00106404	0.00100738	0.0013605	0.00118756	0.00136144	0.00130498	0.00097397	0.00110988	0.000938298	0.00100164	0.00100874	0.00108019	0.00105605	0.00099967	0.00101493	0.00124624	0.00124224	0.00113848	0.00138799	0.000918663	0.000976628
ko00790; Folate biosynthesis	0.00498287	0.00489804	0.0052113	0.00538447	0.00545573	0.00543546	0.00495388	0.0049458	0.00487161	0.00485343	0.00497443	0.00495379	0.0049124	0.00486867	0.00485443	0.0048551	0.00494091	0.00511834	0.00524899	0.00560786	0.00502253
ko00791; Atrazine degradation	0.00107485	0.00106334	0.000916213	0.000838652	0.000891135	0.000943366	0.00113514	0.000878968	0.00111759	0.00112832	0.00111962	0.00110717	0.00102246	0.00111899	0.00113716	0.00100722	0.000889664	0.00092362	0.000762114	0.000949051	0.00111818
ko00830; Retinol metabolism	0.000238832	0.000223485	0.000279574	0.000304689	0.000286116	0.000290856	0.000209104	0.000224974	0.000207319	0.000207347	0.000237761	0.000233072	0.000218224	0.000229617	0.000229752	0.000249222	0.000245718	0.000260636	0.000275325	0.000272211	0.00021356
ko00860; Porphyrin and chlorophyll metabolism	0.0136465	0.0139019	0.0140566	0.0173156	0.0149741	0.0146126	0.0133	0.014754	0.0133337	0.0139168	0.0138673	0.0133824	0.0139748	0.0135296	0.0133708	0.0135464	0.0141568	0.0142504	0.0156249	0.0155662	0.014154
ko00900; Terpenoid backbone biosynthesis	0.00914111	0.00901882	0.00988686	0.0100306	0.00996348	0.00988162	0.00908039	0.00960039	0.00906116	0.00888419	0.00907628	0.00896451	0.00895249	0.00904226	0.00911805	0.00933968	0.00968644	0.00961688	0.010105	0.0101909	0.00902505
ko00901; Indole alkaloid biosynthesis	8.18387e-07	1.61761e-06	7.07954e-07	2.39541e-06	1.49453e-06	1.65005e-06	1.19564e-06	8.99599e-07	1.21782e-06	1.31787e-06	1.19481e-06	1.57271e-06	1.12617e-06	1.00234e-06	9.89536e-07	9.00929e-07	8.40971e-07	9.75172e-07	1.85249e-06	1.13735e-06	1.86778e-06
ko00902; Monoterpenoid biosynthesis	2.67753e-07	9.24764e-07	8.26634e-08	7.29296e-06	2.83041e-06	3.29289e-06	3.72351e-07	7.14028e-07	3.60938e-07	1.93961e-06	2.28755e-06	1.64376e-06	5.29198e-07	5.55977e-07	3.98953e-07	4.53056e-07	1.60245e-07	6.04992e-07	7.92521e-07	5.25939e-07	1.51898e-06
ko00903; Limonene and pinene degradation	0.00145042	0.00144765	0.00137721	0.00156459	0.00144486	0.00145575	0.00139091	0.0013675	0.00137149	0.0015031	0.00147909	0.0015101	0.00147209	0.00143684	0.00144358	0.00140457	0.00135278	0.00140589	0.00134456	0.00127592	0.00146205
ko00906; Carotenoid biosynthesis	0.000341749	0.000347028	0.000373616	0.000514291	0.000440356	0.000435328	0.000326885	0.000344663	0.000321177	0.00031784	0.000328553	0.000350057	0.000366974	0.000325852	0.00031209	0.000369842	0.00036929	0.000362719	0.000419826	0.000314732	0.000341016
ko00908; Zeatin biosynthesis	0.000923052	0.000896049	0.00110715	0.00100064	0.00111213	0.00108447	0.000873264	0.00102187	0.000875916	0.000851262	0.000890184	0.000876758	0.000886667	0.000890143	0.000895484	0.000986829	0.00105674	0.00102794	0.00116823	0.00108101	0.000873804
ko00909; Sesquiterpenoid and triterpenoid biosynthesis	8.51189e-06	7.60171e-06	3.89685e-06	4.3753e-05	4.24525e-05	3.56573e-05	2.69632e-05	3.90139e-06	1.07908e-05	5.56608e-06	1.00817e-05	7.79957e-06	3.31573e-06	4.2599e-06	2.66387e-06	2.66839e-06	7.7015e-06	8.39825e-06	1.02129e-05	5.06821e-06	1.45724e-05
ko00910; Nitrogen metabolism	0.0165418	0.0162169	0.0158764	0.0143562	0.0158798	0.0161057	0.0158566	0.0154975	0.0157301	0.0163064	0.0164774	0.0164697	0.0160572	0.016582	0.0167148	0.0159139	0.0155434	0.0159433	0.015236	0.0148826	0.0163816
ko00920; Sulfur metabolism	0.00317741	0.00316749	0.00321667	0.00349247	0.00333536	0.00333477	0.00322312	0.00305676	0.00313045	0.0032132	0.00321998	0.00323807	0.00320989	0.00319716	0.00319368	0.00310444	0.00303455	0.00308536	0.00326154	0.00320805	0.0033902
ko00930; Caprolactam degradation	0.00052168	0.000519881	0.000472904	0.000557054	0.000486411	0.000504942	0.000501315	0.000479176	0.000500231	0.000542325	0.000545939	0.000531093	0.000493605	0.000534097	0.000552304	0.000485583	0.000470153	0.000496743	0.000432282	0.000426715	0.000534471
ko00940; Phenylpropanoid biosynthesis	0.00176452	0.0016156	0.00209899	0.00158231	0.0018727	0.00185301	0.0016405	0.00155248	0.00156303	0.00165179	0.00173139	0.00184471	0.00180423	0.0016778	0.00164404	0.00192742	0.00171034	0.00162157	0.00201173	0.00155918	0.0017261
ko00941; Flavonoid biosynthesis	3.32105e-05	3.1849e-05	3.6857e-05	3.84085e-05	3.922e-05	3.94246e-05	3.46131e-05	3.07778e-05	3.3989e-05	3.18858e-05	3.39978e-05	3.24496e-05	3.21862e-05	3.31928e-05	3.16137e-05	3.27284e-05	3.15522e-05	3.27547e-05	3.69601e-05	4.49187e-05	3.41161e-05
ko00943; Isoflavonoid biosynthesis	9.16751e-06	9.33146e-06	8.73431e-06	2.36352e-05	1.29666e-05	1.22501e-05	7.67732e-06	1.20643e-05	8.41598e-06	1.00486e-05	1.0024e-05	9.53294e-06	9.32341e-06	8.43525e-06	8.12286e-06	9.74307e-06	1.11962e-05	1.00985e-05	1.24116e-05	1.11082e-05	8.32258e-06
ko00944; Flavone and flavonol biosynthesis	0.000102503	9.16981e-05	0.000122304	0.000102714	0.000113308	0.000108497	8.86749e-05	8.83553e-05	8.0453e-05	0.00010144	0.000103008	0.000108849	0.000107324	9.29252e-05	9.27834e-05	0.000106089	9.49884e-05	9.16607e-05	0.000120761	8.82486e-05	0.000102715
ko00945; Stilbenoid, diarylheptanoid and gingerol biosynthesis	4.07162e-05	4.40623e-05	4.27691e-05	9.49007e-05	6.31652e-05	6.4774e-05	4.50027e-05	3.96916e-05	4.46377e-05	4.84073e-05	5.04139e-05	4.58191e-05	4.17921e-05	4.22457e-05	4.05824e-05	4.05011e-05	3.98845e-05	4.3611e-05	4.79718e-05	6.81171e-05	4.73553e-05
ko00950; Isoquinoline alkaloid biosynthesis	0.000282826	0.000281545	0.000268252	0.000272971	0.000267715	0.00027452	0.000295437	0.000265973	0.000294565	0.000287639	0.00028708	0.000278418	0.000269806	0.000291526	0.000295936	0.000266971	0.000264839	0.000271412	0.000244482	0.000265397	0.000295091
ko00960; Tropane, piperidine and pyridine alkaloid biosynthesis	0.00104321	0.00106348	0.000964186	0.00108961	0.000984756	0.00100478	0.001048	0.00101245	0.00104595	0.0011103	0.00108423	0.00106622	0.0010391	0.00104997	0.00106837	0.000998323	0.000991943	0.00102491	0.00094228	0.000997688	0.00108382
ko00965; Betalain biosynthesis	2.46359e-06	2.88823e-06	3.45087e-06	3.72171e-06	4.18791e-06	4.06089e-06	2.39376e-06	3.37466e-06	2.55249e-06	2.30703e-06	2.32227e-06	2.4541e-06	2.42107e-06	2.43399e-06	2.36268e-06	3.05472e-06	3.47081e-06	3.26986e-06	4.7046e-06	3.93806e-06	2.56347e-06
ko00970; Aminoacyl-tRNA biosynthesis	0.0324911	0.032438	0.0338336	0.0351256	0.0339944	0.0338255	0.0329002	0.0340523	0.0330787	0.0318673	0.0323238	0.0318736	0.0320009	0.0324056	0.0324761	0.0329793	0.0340678	0.0339492	0.0346548	0.0367543	0.032127
ko00980; Metabolism of xenobiotics by cytochrome P450	0.000157172	0.000182495	0.000143701	0.000273681	0.000184817	0.000189863	0.000169196	0.000159163	0.000171434	0.00017987	0.000175791	0.000169082	0.00015818	0.000162114	0.000168206	0.000151592	0.000153513	0.000164814	0.000166797	0.000175516	0.000190655
ko00982; Drug metabolism - cytochrome P450	0.000159452	0.000185297	0.000141924	0.000280175	0.000186839	0.00019249	0.000170368	0.000156595	0.000171757	0.000183092	0.000180278	0.000171986	0.000160043	0.000163562	0.000169575	0.000149735	0.000150653	0.000165828	0.000165172	0.000180372	0.000195131
ko00983; Drug metabolism - other enzymes	0.00384986	0.00379901	0.00400438	0.00403757	0.00401319	0.00399647	0.003812	0.00392166	0.00378668	0.00383583	0.0038702	0.00382234	0.00381253	0.0038125	0.00383331	0.00384375	0.00393231	0.00396437	0.00402468	0.00418191	0.00381444
ko00984; Steroid degradation	5.19844e-05	5.37879e-05	4.15807e-05	0.000128002	6.73666e-05	8.43636e-05	4.6623e-05	6.00148e-05	4.93786e-05	7.46755e-05	8.2701e-05	6.27064e-05	5.53764e-05	5.36593e-05	5.82235e-05	4.92086e-05	4.8438e-05	5.44027e-05	6.15309e-05	9.31023e-05	6.01368e-05
ko01040; Biosynthesis of unsaturated fatty acids	0.000846719	0.000866794	0.000834385	0.000960392	0.000872235	0.000881093	0.000858452	0.000806418	0.000841234	0.000897404	0.000895474	0.000893928	0.000846971	0.00084892	0.000871827	0.000856717	0.000825638	0.00082863	0.0008354	0.000808901	0.000906072
ko01051; Biosynthesis of ansamycins	0.00101679	0.00102328	0.00103873	0.001104	0.00108942	0.00108794	0.00104061	0.00103694	0.00104424	0.00100866	0.00106211	0.00100449	0.000998811	0.00101154	0.00098682	0.00104788	0.0010536	0.00104711	0.00107667	0.00116127	0.00102483
ko01053; Biosynthesis of siderophore group nonribosomal peptides	0.000548943	0.000582184	0.000526656	0.000869224	0.000732396	0.000748818	0.000574188	0.00050876	0.000555551	0.000561966	0.000635366	0.00055232	0.000542832	0.000537807	0.000504074	0.000493082	0.000497385	0.000550317	0.000596704	0.000611942	0.000649983
ko01054; Nonribosomal peptide structures	0.00141249	0.00143275	0.00107229	0.00200837	0.00159115	0.00163694	0.00157646	0.0011468	0.0015424	0.00139012	0.00162143	0.00132106	0.00133172	0.00142158	0.00126126	0.00120751	0.00112645	0.00123495	0.00102979	0.00120615	0.00157275
ko01055; Biosynthesis of vancomycin group antibiotics	0.00063674	0.000623284	0.000705554	0.000541745	0.000637852	0.000628323	0.000613216	0.000635508	0.000597718	0.000621694	0.000621718	0.000667284	0.000674499	0.000606625	0.000603952	0.000671584	0.000653018	0.000641168	0.000696881	0.000561677	0.000628076
ko01056; Biosynthesis of type II polyketide backbone	3.73248e-05	3.93711e-05	3.45175e-05	3.48946e-05	4.04304e-05	4.27023e-05	5.06291e-05	3.12075e-05	4.81389e-05	3.5665e-05	3.83098e-05	3.5105e-05	3.52696e-05	4.10021e-05	3.82142e-05	3.12151e-05	2.91111e-05	3.20881e-05	3.12686e-05	4.48842e-05	4.7327e-05
ko01057; Biosynthesis of type II polyketide products	2.19198e-05	2.45967e-05	2.0067e-05	2.99981e-05	2.40373e-05	2.54554e-05	2.18056e-05	2.5159e-05	2.18644e-05	2.40676e-05	2.45322e-05	2.36169e-05	2.13996e-05	2.33106e-05	2.43425e-05	2.08953e-05	2.25579e-05	2.55514e-05	2.48047e-05	3.50769e-05	2.64668e-05
ko02010; ABC transporters	0.080477	0.0856538	0.0769127	0.0850064	0.0775749	0.0768357	0.0841053	0.0892615	0.0871227	0.0843982	0.0811633	0.0798865	0.0821912	0.0821726	0.0821598	0.0849523	0.0881042	0.0845442	0.0829735	0.0868294	0.0810118
ko02020; Two-component system	0.0773141	0.0771704	0.0732265	0.0678678	0.07096	0.0715253	0.0769557	0.0731021	0.0767369	0.0799416	0.0779223	0.0786014	0.0774761	0.0783022	0.0788845	0.0763849	0.0730662	0.0722315	0.0695187	0.064356	0.0782109
ko02030; Bacterial chemotaxis	0.0142328	0.0150678	0.0128983	0.0122776	0.0128927	0.0129865	0.0156108	0.0149662	0.0161626	0.014543	0.0140862	0.0137381	0.0143645	0.0150939	0.0147158	0.0141614	0.0142754	0.0135671	0.0133592	0.0139601	0.014847
ko02040; Flagellar assembly	0.010902	0.0117051	0.00992523	0.0104072	0.0100536	0.0100931	0.0121321	0.0118445	0.0126418	0.0112915	0.0109208	0.0105186	0.0109699	0.0118399	0.0116239	0.0110463	0.011245	0.0104888	0.0107919	0.0118822	0.011627
ko02060; Phosphotransferase system (PTS)	0.00219373	0.00244106	0.00206306	0.00567789	0.00298358	0.00283431	0.00238674	0.00289581	0.00256139	0.00308308	0.00266805	0.00225875	0.00227783	0.00213721	0.00224367	0.002577	0.00297485	0.00287409	0.00278827	0.0049485	0.00210108
ko03008; Ribosome biogenesis in eukaryotes	0.000677261	0.000672984	0.000729349	0.000785716	0.000733173	0.000724323	0.000692252	0.000752082	0.000706498	0.000666868	0.000680893	0.000654017	0.000653753	0.000674141	0.000680906	0.000719906	0.000767697	0.000746604	0.000752439	0.000844363	0.000655856
ko03010; Ribosome	0.0218923	0.0216859	0.0219505	0.02187	0.022107	0.0219654	0.0215325	0.0224452	0.0215882	0.0211432	0.0213083	0.0215631	0.0216418	0.0214107	0.0213446	0.0218029	0.0221853	0.0225084	0.0221627	0.0225298	0.0210803
ko03013; RNA transport	0.00256874	0.00258859	0.00266305	0.00279065	0.00270799	0.0026978	0.00269386	0.00264832	0.00271598	0.00254136	0.00257251	0.00248163	0.00252842	0.00262676	0.00258359	0.00258152	0.00260567	0.00256099	0.0027321	0.00284725	0.00263773
ko03015; mRNA surveillance pathway	2.71735e-05	2.35116e-05	3.77115e-05	2.43894e-05	4.06908e-05	3.93817e-05	1.81474e-05	2.69474e-05	1.60745e-05	2.45294e-05	2.77644e-05	2.67301e-05	2.70886e-05	2.28164e-05	2.27419e-05	2.52184e-05	2.92199e-05	3.2191e-05	3.8065e-05	2.506e-05	2.42656e-05
ko03018; RNA degradation	0.0125916	0.0124116	0.0142723	0.0139382	0.0143716	0.014076	0.0125762	0.0132805	0.0124805	0.0121025	0.0123202	0.012302	0.012321	0.0123247	0.0123772	0.0132982	0.013606	0.0131627	0.0148624	0.0137055	0.0125422
ko03020; RNA polymerase	0.00214749	0.00212928	0.00229397	0.002354	0.00230018	0.00228205	0.00215958	0.00226291	0.00216495	0.00209065	0.00213369	0.00210065	0.00208961	0.00213052	0.00214586	0.00221601	0.00229096	0.00227163	0.00234752	0.00247678	0.0021116
ko03022; Basal transcription factors	0.000283972	0.000315626	0.000288607	0.000375601	0.00029687	0.000290108	0.000336014	0.000369049	0.000355638	0.000289824	0.000284508	0.00025933	0.000302777	0.000310454	0.000288143	0.000307389	0.000335478	0.000314665	0.000359844	0.000422666	0.000308315
ko03030; DNA replication	0.00695652	0.00689895	0.00722236	0.00756149	0.00721194	0.00718918	0.00694892	0.00721904	0.00695634	0.00688577	0.00697622	0.00691266	0.00692647	0.00694293	0.00698271	0.0070287	0.00724445	0.00727091	0.00730835	0.00775464	0.0068378
ko03040; Spliceosome	1.20564e-05	1.2113e-05	9.30279e-06	2.10415e-05	1.16029e-05	1.12612e-05	9.84703e-06	1.55835e-05	1.00572e-05	1.41318e-05	1.43338e-05	1.16697e-05	1.31908e-05	1.17772e-05	1.09382e-05	1.02655e-05	1.25576e-05	1.50632e-05	1.42428e-05	2.85852e-05	1.09856e-05
ko03050; Proteasome	0.000108381	0.000115156	0.000114015	8.7018e-05	0.000111049	0.00011656	0.000157961	0.000123223	0.000164268	0.000103565	0.000113107	0.000102081	0.000104319	0.000118688	0.000112128	0.000118308	0.000129617	0.000120146	9.95666e-05	0.000164539	0.000127604
ko03060; Protein export	0.00758613	0.00749348	0.00787738	0.00741531	0.00785276	0.00775949	0.00740324	0.00781378	0.00739102	0.00727468	0.00735646	0.00750593	0.00757577	0.00741809	0.00735617	0.00774309	0.00779912	0.00778402	0.00804702	0.00765202	0.00730746
ko03070; Bacterial secretion system	0.0113283	0.011413	0.0107634	0.0103402	0.0107891	0.0108271	0.0114141	0.0112479	0.0114157	0.011253	0.0111598	0.0112719	0.0111645	0.0114439	0.0114941	0.0112219	0.0110903	0.0110727	0.0106956	0.010611	0.0113293
ko03320; PPAR signaling pathway	0.00129207	0.00129548	0.00138476	0.00118073	0.00133791	0.00133863	0.00131627	0.00131199	0.00131925	0.00126811	0.00128208	0.00127383	0.00127406	0.00130204	0.00129226	0.00137882	0.00136643	0.00131881	0.00134089	0.00120682	0.00129244
ko03410; Base excision repair	0.00563558	0.00562288	0.00574254	0.00622711	0.00580134	0.0058106	0.00567865	0.00571138	0.00567102	0.00567523	0.0057095	0.00559707	0.00548826	0.00563784	0.00573547	0.00565443	0.00572919	0.00576111	0.00573022	0.00619384	0.0056843
ko03420; Nucleotide excision repair	0.0125476	0.0124171	0.0132386	0.0138595	0.0133409	0.0132335	0.0127644	0.0131849	0.0127957	0.0123543	0.0125516	0.0122103	0.0121578	0.0125523	0.0126332	0.0128895	0.0133153	0.0131692	0.0134489	0.0143771	0.0123903
ko03430; Mismatch repair	0.0133817	0.01333	0.0139516	0.014496	0.0140539	0.0139824	0.0135758	0.013957	0.0136733	0.0131511	0.0133431	0.0129988	0.0130701	0.0134852	0.0134694	0.013566	0.0139519	0.0138515	0.0142911	0.0153468	0.0132549
ko03440; Homologous recombination	0.0159634	0.0158071	0.0162459	0.016294	0.0161458	0.0161973	0.0159013	0.0163257	0.0159723	0.0154892	0.0158407	0.0157781	0.0159771	0.0159586	0.0158833	0.0157895	0.0162625	0.0164514	0.0163147	0.017102	0.0155905
ko03450; Non-homologous end-joining	2.82395e-05	3.56018e-05	1.72123e-05	9.67383e-05	4.67007e-05	4.80372e-05	2.27188e-05	2.89251e-05	2.29711e-05	3.80966e-05	4.25398e-05	3.11903e-05	3.05644e-05	2.43877e-05	2.27603e-05	2.29229e-05	2.60124e-05	3.15091e-05	3.50663e-05	5.65801e-05	3.61345e-05
ko03460; Fanconi anemia pathway	8.52366e-06	8.43686e-06	1.00877e-05	1.58434e-05	1.39462e-05	1.28606e-05	6.59873e-06	1.21853e-05	7.34913e-06	8.82524e-06	8.54898e-06	6.33159e-06	7.36368e-06	6.73909e-06	6.8584e-06	8.7475e-06	1.23838e-05	1.24469e-05	1.34523e-05	1.6246e-05	6.24232e-06
ko04011; MAPK signaling pathway - yeast	0.000380665	0.000376795	0.00034059	0.000364991	0.00033986	0.000345336	0.00034739	0.000336729	0.000343782	0.000394236	0.000382005	0.000407814	0.00038921	0.000372018	0.000379322	0.000374555	0.000339206	0.000351591	0.000317796	0.000290507	0.000367313
ko04020; Calcium signaling pathway	1.93197e-05	2.09125e-05	1.61897e-05	1.11682e-05	1.39836e-05	1.38487e-05	1.75443e-05	2.33102e-05	1.81452e-05	1.87511e-05	1.74469e-05	2.24619e-05	2.73423e-05	1.92609e-05	1.8071e-05	1.8391e-05	2.18701e-05	2.14868e-05	1.83291e-05	6.05713e-06	1.51779e-05
ko04064; NF-kappa B signaling pathway	7.76519e-10	4.47841e-10	2.43926e-09	3.30181e-08	1.02231e-08	1.23311e-08	1.01192e-10	1.1602e-08	3.86181e-11	4.80627e-09	9.54395e-09	3.05265e-09	3.62984e-09	1.41806e-09	8.02709e-10	2.28264e-09	0	5.67168e-10	1.13887e-10	9.78773e-09	4.57385e-09
ko04070; Phosphatidylinositol signaling system	0.000419264	0.000414494	0.00048034	0.000546075	0.000491944	0.000483736	0.000415255	0.000431948	0.00040809	0.000414966	0.000424421	0.00042437	0.00041444	0.000407123	0.000412199	0.000449404	0.000452553	0.000444752	0.00049807	0.000469518	0.000424823
ko04080; Neuroactive ligand-receptor interaction	2.3093e-08	9.48728e-08	3.47956e-09	2.28742e-07	8.19898e-08	1.2305e-07	3.0727e-08	2.89211e-08	3.03541e-08	7.02606e-08	7.85219e-08	7.1621e-08	4.93267e-08	2.552e-08	3.45053e-08	2.98516e-08	6.40611e-09	3.62946e-08	8.35552e-08	2.03666e-08	1.28355e-07
ko04112; Cell cycle - Caulobacter	0.0162024	0.0162617	0.0158199	0.0156188	0.0157684	0.0158682	0.0162021	0.0162015	0.0162945	0.0160838	0.0161701	0.0160651	0.0161805	0.016357	0.0163073	0.0158853	0.0160501	0.0162267	0.015885	0.0164304	0.0161442
ko04113; Meiosis - yeast	0.00110882	0.00111815	0.0014434	0.00096202	0.00112993	0.00108757	0.00113233	0.00122953	0.00113894	0.00106129	0.00101767	0.0011827	0.00120595	0.00111908	0.00112413	0.00146477	0.00135458	0.00106577	0.00148048	0.000645548	0.00110008
ko04114; Oocyte meiosis	1.43074e-11	6.37329e-12	0	2.53294e-10	4.60305e-11	4.53829e-11	0	4.83835e-11	0	1.16229e-11	4.44745e-11	0	1.0458e-11	0	1.479e-11	2.88431e-11	0	0	0	2.7591e-11	5.52355e-11
ko04115; p53 signaling pathway	1.33729e-06	2.57976e-06	2.0346e-06	1.40048e-06	1.81559e-06	1.72064e-06	1.70134e-06	2.71885e-06	2.0227e-06	1.64175e-06	1.42977e-06	1.75254e-06	1.94441e-06	1.6207e-06	1.60834e-06	2.54274e-06	2.8197e-06	2.08346e-06	3.82823e-06	8.04254e-07	2.19644e-06
ko04122; Sulfur relay system	0.00518332	0.00522796	0.00461369	0.00496694	0.00470122	0.00474393	0.00511449	0.00511025	0.00516399	0.00519812	0.00511174	0.00519714	0.0053429	0.00523519	0.00515969	0.00487533	0.0048788	0.00503577	0.00461072	0.0046798	0.0050682
ko04141; Protein processing in endoplasmic reticulum	0.00102138	0.0010252	0.00102032	0.000901055	0.00097791	0.000980326	0.000971062	0.00108231	0.00098818	0.000942804	0.000963702	0.00103333	0.0011329	0.00101362	0.000969191	0.000981144	0.00103748	0.00105987	0.00106078	0.000884907	0.000952428
ko04142; Lysosome	0.00230232	0.00203629	0.0029222	0.00152381	0.00239911	0.0023012	0.00210542	0.00180953	0.00183647	0.00228106	0.00225145	0.00265576	0.00248056	0.00210419	0.00214429	0.00270897	0.00217353	0.00190534	0.0026348	0.00114153	0.002234
ko04144; Endocytosis	6.47571e-07	1.22243e-06	3.31227e-07	1.74739e-06	8.01687e-07	8.37187e-07	6.27995e-07	6.16026e-07	6.19528e-07	1.31453e-06	1.03013e-06	1.03975e-06	8.3433e-07	5.74555e-07	7.19416e-07	5.17662e-07	5.64758e-07	9.00213e-07	1.01819e-06	8.75954e-07	1.26659e-06
ko04146; Peroxisome	0.00147622	0.00148288	0.00164554	0.00149108	0.00165417	0.00163724	0.00150467	0.00152904	0.00149741	0.00145153	0.00146499	0.00146345	0.00146402	0.00145493	0.00145503	0.00156251	0.00158695	0.00152842	0.00166372	0.0014884	0.00152354
ko04210; Apoptosis	0.000811759	0.000713851	0.000912398	0.000602666	0.000801223	0.000798922	0.000707188	0.000673682	0.000683379	0.000714943	0.000764391	0.000824371	0.000755844	0.00077929	0.000782916	0.000883082	0.000754276	0.000727893	0.000819654	0.000634483	0.000698453
ko04260; Cardiac muscle contraction	4.28567e-05	4.09292e-05	4.84124e-05	3.99431e-05	4.70962e-05	4.74703e-05	4.05845e-05	3.72154e-05	3.86875e-05	3.96878e-05	4.25728e-05	4.44451e-05	4.07244e-05	4.11107e-05	4.15028e-05	4.50836e-05	4.15001e-05	4.31983e-05	4.62283e-05	4.59493e-05	4.21613e-05
ko04270; Vascular smooth muscle contraction	1.43074e-11	6.37329e-12	0	2.53294e-10	4.60305e-11	4.53829e-11	0	4.83835e-11	0	1.16229e-11	4.44745e-11	0	1.0458e-11	0	1.479e-11	2.88431e-11	0	0	0	2.7591e-11	5.52355e-11
ko04310; Wnt signaling pathway	1.37494e-05	1.29286e-05	1.09953e-05	7.06166e-06	1.06406e-05	1.13367e-05	1.30963e-05	1.06722e-05	1.30393e-05	1.32818e-05	1.34791e-05	1.33993e-05	1.20016e-05	1.44737e-05	1.49696e-05	1.21187e-05	1.08183e-05	1.14155e-05	7.82753e-06	7.7437e-06	1.30023e-05
ko04330; Notch signaling pathway	1.37494e-05	1.29286e-05	1.09953e-05	7.06166e-06	1.06406e-05	1.13367e-05	1.30963e-05	1.06722e-05	1.30393e-05	1.32818e-05	1.34791e-05	1.33993e-05	1.20016e-05	1.44737e-05	1.49696e-05	1.21187e-05	1.08183e-05	1.14155e-05	7.82753e-06	7.7437e-06	1.30023e-05
ko04370; VEGF signaling pathway	1.74482e-05	1.7855e-05	1.19823e-05	9.46433e-06	9.90749e-06	1.07028e-05	1.37304e-05	1.72758e-05	1.41646e-05	1.73712e-05	1.683e-05	2.09708e-05	2.50537e-05	1.72851e-05	1.60407e-05	1.33858e-05	1.54029e-05	1.78138e-05	1.17702e-05	4.95809e-06	1.3395e-05
ko04510; Focal adhesion	1.43969e-05	1.38072e-05	1.17026e-05	8.20723e-06	9.30669e-06	1.01499e-05	1.37627e-05	1.07872e-05	1.37701e-05	1.49352e-05	1.45735e-05	1.47225e-05	1.27157e-05	1.4503e-05	1.55328e-05	1.39937e-05	1.16295e-05	1.19829e-05	7.85374e-06	8.8861e-06	1.36666e-05
ko04512; ECM-receptor interaction	1.43969e-05	1.38072e-05	1.17026e-05	8.20723e-06	9.30669e-06	1.01499e-05	1.37627e-05	1.07872e-05	1.37701e-05	1.49352e-05	1.45735e-05	1.47225e-05	1.27157e-05	1.4503e-05	1.55328e-05	1.39937e-05	1.16295e-05	1.19829e-05	7.85374e-06	8.8861e-06	1.36666e-05
ko04514; Cell adhesion molecules (CAMs)	6.13599e-10	1.11339e-09	0	1.50518e-08	7.58689e-09	1.0006e-08	7.02724e-11	9.53909e-10	0	1.45069e-10	2.56506e-09	0	5.95237e-10	1.68822e-09	6.5846e-11	1.09444e-09	0	1.69965e-09	1.31309e-10	8.16475e-10	2.33505e-10
ko04610; Complement and coagulation cascades	6.24146e-07	9.34964e-07	1.88374e-07	9.75254e-07	2.66036e-06	1.9527e-06	2.32023e-06	2.26433e-07	8.73862e-07	3.8684e-07	3.42748e-07	8.07962e-07	3.37775e-07	3.80727e-07	4.4757e-07	1.1257e-07	3.26506e-07	5.77471e-07	1.21434e-06	3.85969e-07	1.77277e-06
ko04612; Antigen processing and presentation	0.00021139	0.000202053	0.00022981	0.000192186	0.000228019	0.000225195	0.000203462	0.000211094	0.000200747	0.000195741	0.000202981	0.000201175	0.000204011	0.000210613	0.000206672	0.000215131	0.00021361	0.000210277	0.000233192	0.000216032	0.000205223
ko04614; Renin-angiotensin system	0.000177088	0.000152687	0.000248695	0.00022602	0.000268757	0.0002633	0.000144871	0.000184249	0.000139915	0.000140761	0.000171289	0.000161364	0.000154963	0.000154745	0.000150614	0.00019388	0.000218077	0.000226127	0.000258435	0.000293587	0.000140031
ko04621; NOD-like receptor signaling pathway	0.000425065	0.000410074	0.000501267	0.000400644	0.000517589	0.00050417	0.00039238	0.000430253	0.000372133	0.000474308	0.000461603	0.000454298	0.000454608	0.00040599	0.000413176	0.000427613	0.000458596	0.000469606	0.000500177	0.000482765	0.000423302
ko04622; RIG-I-like receptor signaling pathway	3.7932e-05	4.76544e-05	3.75724e-05	6.9049e-05	3.93382e-05	3.7585e-05	3.73315e-05	4.36895e-05	3.84424e-05	5.37324e-05	4.62547e-05	4.31598e-05	4.43552e-05	3.61192e-05	3.68922e-05	5.23293e-05	5.13873e-05	5.29502e-05	4.1365e-05	5.23514e-05	3.83097e-05
ko04626; Plant-pathogen interaction	0.0024572	0.00244617	0.00257755	0.00233416	0.00244958	0.00243939	0.00242022	0.00246032	0.00240345	0.00251893	0.00248279	0.00247832	0.00245715	0.00245588	0.00249342	0.00254186	0.00252943	0.00248201	0.00253791	0.00237821	0.00247904
ko04640; Hematopoietic cell lineage	0.000140641	0.000114808	0.000206378	0.000163392	0.000222831	0.000216078	0.000103628	0.000151003	0.00010103	9.4195e-05	0.000124894	0.000116777	0.000114983	0.000119184	0.000116264	0.00014555	0.000169419	0.000180967	0.000213534	0.000217767	0.000107621
ko04666; Fc gamma R-mediated phagocytosis	1.81289e-05	1.91703e-05	1.2322e-05	1.12256e-05	1.0737e-05	1.15672e-05	1.43964e-05	1.79024e-05	1.48197e-05	1.87439e-05	1.79087e-05	2.20762e-05	2.59362e-05	1.78903e-05	1.68007e-05	1.39279e-05	1.59912e-05	1.87702e-05	1.28757e-05	5.83307e-06	1.47692e-05
ko04720; Long-term potentiation	1.43074e-11	6.37329e-12	0	2.53294e-10	4.60305e-11	4.53829e-11	0	4.83835e-11	0	1.16229e-11	4.44745e-11	0	1.0458e-11	0	1.479e-11	2.88431e-11	0	0	0	2.7591e-11	5.52355e-11
ko04721; Synaptic vesicle cycle	3.67628e-05	3.80798e-05	3.64551e-05	1.74589e-05	3.12365e-05	3.14321e-05	3.67113e-05	3.91066e-05	3.77644e-05	3.77681e-05	3.5756e-05	3.71769e-05	3.67216e-05	3.89419e-05	4.04061e-05	3.96989e-05	4.06038e-05	3.61272e-05	3.44453e-05	1.96655e-05	3.55741e-05
ko04722; Neurotrophin signaling pathway	1.43074e-11	6.37329e-12	0	2.53294e-10	4.60305e-11	4.53829e-11	0	4.83835e-11	0	1.16229e-11	4.44745e-11	0	1.0458e-11	0	1.479e-11	2.88431e-11	0	0	0	2.7591e-11	5.52355e-11
ko04723; Retrograde endocannabinoid signaling	0.000147489	0.000132374	0.000169656	9.41026e-05	0.000130765	0.000130172	0.000131945	0.000102104	0.000120499	0.000147657	0.000143498	0.000172345	0.000151234	0.000133788	0.000139845	0.000171756	0.000122724	0.00010461	0.000142524	4.83547e-05	0.000144222
ko04724; Glutamatergic synapse	0.00057392	0.000564161	0.000558952	0.000507901	0.000559351	0.000566286	0.000581322	0.000539229	0.000570356	0.000557786	0.000568186	0.000575047	0.000571942	0.000572759	0.000566535	0.000537904	0.000525287	0.000552336	0.000529813	0.000535264	0.000584481
ko04725; Cholinergic synapse	4.76595e-06	4.7036e-06	3.06471e-06	1.20527e-05	7.29996e-06	6.97312e-06	3.27514e-06	4.74502e-06	3.55375e-06	6.38775e-06	6.02474e-06	3.97463e-06	4.13894e-06	3.22739e-06	3.32766e-06	3.56215e-06	4.48482e-06	4.83183e-06	3.54876e-06	5.85112e-06	4.04323e-06
ko04726; Serotonergic synapse	4.69597e-06	5.26778e-06	3.34231e-06	9.74821e-06	6.05715e-06	5.98165e-06	4.33534e-06	4.61942e-06	4.38532e-06	5.73662e-06	5.9506e-06	4.61795e-06	4.77245e-06	4.21434e-06	3.89246e-06	3.8918e-06	4.39115e-06	4.96324e-06	4.99766e-06	7.156e-06	5.05324e-06
ko04727; GABAergic synapse	0.000685126	0.000672294	0.000667507	0.00057033	0.000646561	0.000656617	0.000693068	0.000628992	0.000677364	0.000672605	0.000679923	0.000697102	0.000684634	0.000688712	0.000685833	0.000659595	0.000626746	0.000646442	0.000615769	0.000579004	0.000695158
ko04728; Dopaminergic synapse	6.14561e-06	6.44134e-06	5.40197e-06	1.12834e-05	8.40216e-06	8.19055e-06	5.27304e-06	6.19546e-06	5.31874e-06	6.74845e-06	7.27188e-06	5.81966e-06	5.82662e-06	5.42815e-06	5.0617e-06	5.35339e-06	6.07008e-06	6.8586e-06	7.32878e-06	9.93519e-06	6.03467e-06
ko04740; Olfactory transduction	1.43074e-11	6.37329e-12	0	2.53294e-10	4.60305e-11	4.53829e-11	0	4.83835e-11	0	1.16229e-11	4.44745e-11	0	1.0458e-11	0	1.479e-11	2.88431e-11	0	0	0	2.7591e-11	5.52355e-11
ko04744; Phototransduction	1.43074e-11	6.37329e-12	0	2.53294e-10	4.60305e-11	4.53829e-11	0	4.83835e-11	0	1.16229e-11	4.44745e-11	0	1.0458e-11	0	1.479e-11	2.88431e-11	0	0	0	2.7591e-11	5.52355e-11
ko04745; Phototransduction - fly	1.43074e-11	6.37329e-12	0	2.53294e-10	4.60305e-11	4.53829e-11	0	4.83835e-11	0	1.16229e-11	4.44745e-11	0	1.0458e-11	0	1.479e-11	2.88431e-11	0	0	0	2.7591e-11	5.52355e-11
ko04810; Regulation of actin cytoskeleton	6.96269e-10	1.16944e-09	0	1.62595e-08	7.80637e-09	1.02224e-08	7.02724e-11	1.1846e-09	0	2.00488e-10	2.82085e-09	0	6.45102e-10	1.68822e-09	1.51304e-10	1.23196e-09	0	1.69965e-09	1.31309e-10	9.4803e-10	4.96871e-10
ko04910; Insulin signaling pathway	0.00113902	0.0011066	0.00117614	0.00129061	0.00119592	0.00115668	0.00109729	0.00121743	0.00110473	0.00111961	0.00114004	0.001093	0.00111034	0.00112089	0.00110961	0.00119655	0.00121554	0.00119911	0.00129357	0.00161105	0.00108219
ko04912; GnRH signaling pathway	6.47585e-07	1.22244e-06	3.31227e-07	1.74765e-06	8.01733e-07	8.37232e-07	6.27995e-07	6.16074e-07	6.19528e-07	1.31454e-06	1.03017e-06	1.03975e-06	8.34341e-07	5.74555e-07	7.1943e-07	5.17691e-07	5.64758e-07	9.00213e-07	1.01819e-06	8.75982e-07	1.26665e-06
ko04914; Progesterone-mediated oocyte maturation	0.00021139	0.000202053	0.00022981	0.000192186	0.000228019	0.000225195	0.000203462	0.000211094	0.000200747	0.000195741	0.000202981	0.000201175	0.000204011	0.000210613	0.000206672	0.000215131	0.00021361	0.000210277	0.000233192	0.000216032	0.000205223
ko04916; Melanogenesis	3.27946e-07	7.22097e-07	6.90507e-07	9.1691e-07	8.55909e-07	7.86632e-07	4.55902e-07	9.71174e-07	5.9079e-07	4.12608e-07	2.1853e-07	3.92817e-07	5.48615e-07	3.96767e-07	4.04198e-07	8.38641e-07	9.91265e-07	6.43395e-07	1.31703e-06	1.08431e-07	5.10318e-07
ko04920; Adipocytokine signaling pathway	0.000626525	0.000626675	0.00081544	0.000576709	0.000783723	0.000762809	0.000656768	0.000700898	0.000652419	0.000562942	0.000593251	0.000608963	0.000635367	0.000599539	0.000580607	0.000723236	0.000749678	0.000680504	0.000851294	0.000638259	0.000641819
ko04930; Type II diabetes mellitus	0.000187248	0.000187353	0.000209381	0.000211632	0.000203004	0.00019646	0.000176888	0.000214852	0.000179448	0.000187791	0.000185832	0.000185532	0.000187099	0.000182664	0.000187797	0.000209117	0.000221988	0.000210518	0.000226416	0.000212568	0.000175869
ko04940; Type I diabetes mellitus	0.000427663	0.000422626	0.000417963	0.000398444	0.000410086	0.000408284	0.000413187	0.000420882	0.000409142	0.000414919	0.000413097	0.000435863	0.000435674	0.000410641	0.000407984	0.000427938	0.000417746	0.000428024	0.000410672	0.000375741	0.000408093
ko04960; Aldosterone-regulated sodium reabsorption	4.12183e-05	3.67717e-05	4.73131e-05	3.36683e-05	4.40701e-05	4.39676e-05	3.8104e-05	3.60424e-05	3.62678e-05	3.68089e-05	3.97227e-05	4.12403e-05	3.82286e-05	3.91479e-05	3.94451e-05	4.3648e-05	4.05164e-05	4.11957e-05	4.27222e-05	4.44386e-05	3.71728e-05
ko04961; Endocrine and other factor-regulated calcium reabsorption	4.12248e-05	3.68015e-05	4.73139e-05	3.37418e-05	4.41025e-05	4.40104e-05	3.81131e-05	3.6048e-05	3.62765e-05	3.68306e-05	3.97445e-05	4.12628e-05	3.82437e-05	3.9157e-05	3.94548e-05	4.36553e-05	4.05183e-05	4.1208e-05	4.27495e-05	4.44455e-05	3.72122e-05
ko04962; Vasopressin-regulated water reabsorption	3.67628e-05	3.80798e-05	3.64551e-05	1.74589e-05	3.12365e-05	3.14321e-05	3.67113e-05	3.91066e-05	3.77644e-05	3.77681e-05	3.5756e-05	3.71769e-05	3.67216e-05	3.89419e-05	4.04061e-05	3.96989e-05	4.06038e-05	3.61272e-05	3.44453e-05	1.96655e-05	3.55741e-05
ko04964; Proximal tubule bicarbonate reclamation	0.00015362	0.000154953	0.000163191	0.000138359	0.000149168	0.000150519	0.000169323	0.000148908	0.000165932	0.000148508	0.000149579	0.000154123	0.000149861	0.000158962	0.000160943	0.000162022	0.000153262	0.000145805	0.000150794	0.000114696	0.000161274
ko04970; Salivary secretion	4.12184e-05	3.67717e-05	4.73131e-05	3.36686e-05	4.40701e-05	4.39676e-05	3.8104e-05	3.60424e-05	3.62678e-05	3.68089e-05	3.97228e-05	4.12403e-05	3.82286e-05	3.91479e-05	3.94451e-05	4.3648e-05	4.05164e-05	4.11957e-05	4.27222e-05	4.44386e-05	3.71729e-05
ko04971; Gastric acid secretion	4.12184e-05	3.67717e-05	4.73131e-05	3.36686e-05	4.40701e-05	4.39676e-05	3.8104e-05	3.60424e-05	3.62678e-05	3.68089e-05	3.97228e-05	4.12403e-05	3.82286e-05	3.91479e-05	3.94451e-05	4.3648e-05	4.05164e-05	4.11957e-05	4.27222e-05	4.44386e-05	3.71729e-05
ko04972; Pancreatic secretion	4.1242e-05	3.68667e-05	4.73165e-05	3.40037e-05	4.42038e-05	4.41444e-05	3.81352e-05	3.60732e-05	3.62982e-05	3.68811e-05	3.98044e-05	4.13126e-05	3.82782e-05	3.91778e-05	3.94802e-05	4.36786e-05	4.05228e-05	4.12322e-05	4.28067e-05	4.44651e-05	3.73041e-05
ko04973; Carbohydrate digestion and absorption	0.000750562	0.000704296	0.000919458	0.000722407	0.000893086	0.00086609	0.00067866	0.000798273	0.000665332	0.000690261	0.000731089	0.000750417	0.00075563	0.000702706	0.000688375	0.000832258	0.000863553	0.000873459	0.000954191	0.00101454	0.000655031
ko04974; Protein digestion and absorption	0.00134365	0.00115712	0.00191226	0.00116651	0.00183411	0.00177469	0.00103739	0.00133399	0.00093949	0.00121103	0.00133977	0.00138604	0.00137261	0.00118566	0.00120005	0.00142703	0.00151216	0.00154584	0.00184913	0.00134787	0.0012087
ko04975; Fat digestion and absorption	1.46074e-06	1.18285e-06	1.88646e-06	2.06625e-07	3.64432e-07	5.18823e-07	1.4611e-06	4.66349e-07	1.32979e-06	1.2426e-06	1.34326e-06	2.13102e-06	1.60932e-06	1.4959e-06	1.51154e-06	2.56681e-06	1.15501e-06	6.58061e-07	1.19936e-06	5.25259e-08	1.10228e-06
ko04976; Bile secretion	4.32151e-05	4.10269e-05	5.17222e-05	3.99986e-05	4.89447e-05	4.85156e-05	4.1041e-05	4.25704e-05	4.00463e-05	4.01586e-05	4.24079e-05	4.42789e-05	4.15708e-05	4.17216e-05	4.1987e-05	4.91251e-05	4.68537e-05	4.52534e-05	5.07744e-05	4.53596e-05	4.03688e-05
ko04978; Mineral absorption	0.000363065	0.000357517	0.000367744	0.000358245	0.000394529	0.000399658	0.000360479	0.000358185	0.000360659	0.000347844	0.000362011	0.000340625	0.000335993	0.000364221	0.000366803	0.000332471	0.000351768	0.000372205	0.000359653	0.000403745	0.000369344
ko05010; Alzheimers disease	0.000958086	0.000925741	0.00096725	0.000992089	0.00100308	0.00102139	0.000988369	0.000890548	0.000983381	0.000915601	0.000961321	0.000929254	0.000887546	0.000988692	0.000984258	0.000932157	0.000910463	0.000929395	0.000887916	0.000978631	0.000950844
ko05012; Parkinsons disease	5.5187e-05	5.59324e-05	7.34427e-05	0.000133139	8.50538e-05	7.98941e-05	4.57519e-05	7.86996e-05	4.76358e-05	4.77253e-05	5.54751e-05	4.70006e-05	5.32996e-05	5.21641e-05	5.15801e-05	5.77469e-05	7.48698e-05	7.72913e-05	9.97261e-05	0.000105333	5.20446e-05
ko05014; Amyotrophic lateral sclerosis (ALS)	3.42124e-05	3.94564e-05	3.8161e-05	7.08009e-05	5.54826e-05	5.30144e-05	3.61731e-05	3.52798e-05	3.10417e-05	4.49485e-05	4.17457e-05	4.39614e-05	4.30157e-05	3.28308e-05	3.38044e-05	3.78419e-05	3.76856e-05	3.5582e-05	4.48935e-05	2.0002e-05	4.42505e-05
ko05016; Huntingtons disease	0.000268529	0.000272777	0.000249459	0.000262093	0.000272575	0.000279882	0.000295978	0.000222409	0.000287635	0.000281589	0.000279534	0.000276463	0.000261871	0.000278804	0.000275826	0.000252367	0.00022672	0.000230513	0.000229803	0.000236637	0.000297487
ko05020; Prion diseases	6.96644e-06	8.139e-06	4.02672e-06	1.3643e-05	7.57073e-06	7.30929e-06	5.69243e-06	7.1648e-06	6.06034e-06	9.80654e-06	9.90942e-06	7.55472e-06	7.10928e-06	5.98344e-06	5.93532e-06	5.60232e-06	6.44737e-06	7.58066e-06	6.03464e-06	7.47437e-06	7.4216e-06
ko05030; Cocaine addiction	4.69434e-06	5.26733e-06	3.33139e-06	9.50951e-06	5.94428e-06	5.8442e-06	4.33429e-06	4.58903e-06	4.38528e-06	5.72985e-06	5.93008e-06	4.6149e-06	4.7631e-06	4.20426e-06	3.88954e-06	3.88904e-06	4.39115e-06	4.96267e-06	4.99577e-06	7.10212e-06	5.04375e-06
ko05031; Amphetamine addiction	4.69435e-06	5.26734e-06	3.33139e-06	9.50976e-06	5.94432e-06	5.84424e-06	4.33429e-06	4.58908e-06	4.38528e-06	5.72986e-06	5.93012e-06	4.6149e-06	4.76311e-06	4.20426e-06	3.88955e-06	3.88907e-06	4.39115e-06	4.96267e-06	4.99577e-06	7.10215e-06	5.0438e-06
ko05032; Morphine addiction	4.03401e-05	6.05787e-05	7.40221e-05	1.97868e-05	5.06124e-05	4.18261e-05	5.41345e-05	9.87284e-05	6.71184e-05	3.65723e-05	2.38901e-05	3.60155e-05	5.26447e-05	4.77372e-05	4.71453e-05	8.81043e-05	0.000102786	6.14951e-05	0.000109787	2.41917e-05	3.96003e-05
ko05034; Alcoholism	5.68061e-06	7.02018e-06	5.8983e-06	1.01272e-05	7.78314e-06	7.50872e-06	5.647e-06	7.97752e-06	6.21873e-06	6.54333e-06	6.68033e-06	5.69526e-06	6.29014e-06	5.44103e-06	5.09019e-06	6.76878e-06	7.9671e-06	6.96048e-06	9.14782e-06	7.57398e-06	5.88507e-06
ko05100; Bacterial invasion of epithelial cells	0.0015131	0.00155288	0.00140151	0.00182154	0.00162195	0.00167315	0.00174018	0.00141419	0.00176567	0.00151785	0.00160876	0.00144981	0.00145128	0.00161909	0.0015244	0.00151441	0.00142477	0.00143506	0.00132418	0.00176839	0.00158601
ko05110; Vibrio cholerae infection	1.63703e-05	1.64245e-05	1.55788e-05	2.50849e-05	1.85554e-05	2.08769e-05	2.17973e-05	1.06902e-05	2.10934e-05	1.74647e-05	1.7934e-05	1.84384e-05	1.63042e-05	1.83669e-05	1.72573e-05	1.68829e-05	1.21699e-05	1.19318e-05	1.1072e-05	1.3671e-05	1.82844e-05
ko05111; Vibrio cholerae pathogenic cycle	0.00172444	0.00178878	0.00194235	0.00159319	0.00192115	0.00189689	0.00170674	0.00192041	0.00174734	0.00166042	0.00164435	0.00166725	0.00168437	0.00173126	0.00175511	0.00188494	0.00197182	0.00185809	0.00208176	0.00169576	0.00171987
ko05120; Epithelial cell signaling in Helicobacter pylori infection	0.00246555	0.00244115	0.00260988	0.00220264	0.00259264	0.00258454	0.00247742	0.00250785	0.00247247	0.00237581	0.00242197	0.00238361	0.00235838	0.00246334	0.00246937	0.00250803	0.00253813	0.00252148	0.00266431	0.00292387	0.00244047
ko05130; Pathogenic Escherichia coli infection	7.40628e-05	6.99108e-05	5.46284e-05	3.1418e-05	4.97016e-05	5.4441e-05	7.32096e-05	5.48964e-05	7.28738e-05	7.36639e-05	7.34993e-05	7.37699e-05	6.5956e-05	8.06835e-05	8.323e-05	6.55522e-05	5.56201e-05	5.76805e-05	3.4173e-05	3.73414e-05	7.08587e-05
ko05131; Shigellosis	1.8246e-06	9.34534e-06	4.66555e-07	3.59095e-06	1.81192e-06	2.54468e-06	2.85516e-06	6.98864e-07	2.81253e-06	5.36571e-06	5.0254e-06	6.54258e-06	4.53146e-06	2.13882e-06	2.97499e-06	1.82224e-06	6.13617e-07	3.45994e-06	8.4356e-06	2.86086e-06	1.12078e-05
ko05132; Salmonella infection	0.00166293	0.00166872	0.00166818	0.001375	0.00161458	0.00163435	0.00164401	0.00166467	0.00164688	0.00167043	0.00163408	0.00163975	0.00162385	0.00165744	0.00170246	0.00159946	0.00164199	0.0016632	0.0016492	0.00163638	0.00171069
ko05133; Pertussis	0.00143722	0.00147942	0.00154196	0.00115785	0.00143878	0.00148011	0.00156083	0.00134026	0.00151897	0.00146717	0.00144805	0.00147789	0.00145409	0.00142622	0.00146748	0.00135014	0.00131427	0.00131099	0.00145039	0.00131772	0.00170608
ko05134; Legionellosis	0.00298999	0.00296999	0.00292427	0.00268507	0.00290883	0.00292489	0.00305513	0.00294886	0.0030567	0.00294528	0.0029529	0.00293206	0.00287711	0.00304742	0.00307146	0.002979	0.00296841	0.00293213	0.00281961	0.00287727	0.00297061
ko05140; Leishmaniasis	7.76519e-10	4.47841e-10	2.43926e-09	3.30181e-08	1.02231e-08	1.23311e-08	1.01192e-10	1.1602e-08	3.86181e-11	4.80627e-09	9.54395e-09	3.05265e-09	3.62984e-09	1.41806e-09	8.02709e-10	2.28264e-09	0	5.67168e-10	1.13887e-10	9.78773e-09	4.57385e-09
ko05142; Chagas disease (American trypanosomiasis)	8.47531e-05	9.45545e-05	0.000153307	8.51324e-05	0.000126909	0.000119354	0.000105321	0.000146926	0.000118566	6.37265e-05	7.1944e-05	8.36978e-05	8.84736e-05	8.38837e-05	8.19797e-05	0.000158373	0.000178086	0.000136449	0.000180896	0.000154237	7.33785e-05
ko05143; African trypanosomiasis	0.000456176	0.000484016	0.000443773	0.000513436	0.000483709	0.000490159	0.0005771	0.000469014	0.000590426	0.000468625	0.000496124	0.000429794	0.000444391	0.000478081	0.000442644	0.000457651	0.000473425	0.000471352	0.000473903	0.000696209	0.000509221
ko05145; Toxoplasmosis	2.9457e-06	5.40973e-06	6.07654e-06	1.50349e-06	5.18748e-06	4.13635e-06	5.27203e-06	8.59907e-06	5.82205e-06	2.74239e-06	1.49357e-06	2.88803e-06	4.06658e-06	3.29204e-06	3.5125e-06	7.3972e-06	9.08429e-06	5.41361e-06	1.01951e-05	1.41188e-06	3.75931e-06
ko05146; Amoebiasis	0.000671463	0.000692038	0.000641719	0.000636924	0.000717482	0.000746972	0.000807909	0.000618374	0.000805071	0.000652226	0.000687919	0.00061815	0.000641456	0.000709203	0.000663028	0.000568265	0.000575125	0.000623081	0.000606373	0.000824181	0.000786548
ko05150; Staphylococcus aureus infection	0.000993819	0.00102922	0.000865842	0.00316804	0.00153921	0.00155189	0.00104457	0.0010777	0.0010818	0.0011695	0.0011223	0.00105435	0.00102761	0.00104525	0.00104839	0.000971076	0.00103708	0.00115868	0.000954638	0.00158868	0.000966524
ko05152; Tuberculosis	0.00155278	0.00152522	0.00160222	0.00172016	0.00164801	0.00162343	0.00149198	0.00161902	0.00149615	0.00150561	0.0015335	0.00150998	0.00152036	0.00151073	0.00151282	0.00154367	0.00160242	0.00162958	0.00167016	0.00170805	0.00150534
ko05160; Hepatitis C	1.06316e-08	1.90079e-08	8.31001e-09	8.31956e-08	3.04061e-08	3.5634e-08	2.67524e-08	1.39224e-08	2.97819e-08	3.72781e-08	3.20011e-08	2.53455e-08	1.19491e-08	1.63587e-08	1.58597e-08	2.22913e-08	2.8088e-08	3.42588e-08	2.08865e-08	1.87387e-07	1.03909e-08
ko05162; Measles	1.06316e-08	1.90079e-08	8.31001e-09	8.31956e-08	3.04061e-08	3.5634e-08	2.67524e-08	1.39224e-08	2.97819e-08	3.72781e-08	3.20011e-08	2.53455e-08	1.19491e-08	1.63587e-08	1.58597e-08	2.22913e-08	2.8088e-08	3.42588e-08	2.08865e-08	1.87387e-07	1.03909e-08
ko05164; Influenza A	4.69827e-05	5.64973e-05	5.74102e-05	2.78462e-05	5.19197e-05	4.73179e-05	5.20977e-05	7.63121e-05	5.7497e-05	3.96389e-05	3.54525e-05	4.349e-05	5.54205e-05	4.72112e-05	4.43987e-05	6.39496e-05	7.29567e-05	5.79812e-05	7.74794e-05	3.61675e-05	4.25416e-05
ko05168; Herpes simplex infection	1.19236e-06	2.50948e-06	1.90773e-06	1.26551e-06	1.68573e-06	1.59532e-06	1.65469e-06	2.6014e-06	1.98146e-06	1.50785e-06	1.11383e-06	1.62433e-06	1.80899e-06	1.46572e-06	1.5194e-06	2.48764e-06	2.72616e-06	1.91446e-06	3.68242e-06	5.57959e-07	2.09243e-06
ko05169; Epstein-Barr virus infection	9.91004e-12	0	0	2.34174e-09	1.18036e-09	1.3435e-09	1.09329e-11	9.92561e-12	0	2.25697e-11	3.26708e-11	0	0	9.957e-11	1.02443e-11	0	0	1.29702e-10	2.0429e-11	1.27027e-10	3.63285e-11
ko05200; Pathways in cancer	0.000399779	0.000401667	0.000395803	0.000358572	0.000376649	0.000379773	0.000383888	0.000406365	0.000383685	0.000398434	0.000395003	0.000409448	0.000418644	0.000405035	0.000407466	0.000397116	0.000403632	0.000401202	0.000385047	0.000319424	0.000387027
ko05202; Transcriptional misregulation in cancer	5.91485e-08	2.37568e-07	1.88055e-08	1.55978e-07	8.25953e-08	1.01979e-07	7.59665e-08	2.20808e-08	7.03439e-08	1.32555e-07	1.18854e-07	1.61147e-07	1.159e-07	8.36599e-08	1.2076e-07	4.18179e-08	2.10626e-08	9.68173e-08	1.92114e-07	1.64807e-08	3.32379e-07
ko05203; Viral carcinogenesis	0.000174606	0.000171849	0.000189204	0.000206754	0.000190117	0.000185448	0.00016266	0.000193839	0.000164972	0.000172796	0.000174347	0.000170907	0.000168953	0.000169443	0.000174759	0.000187972	0.000199308	0.000194828	0.000202671	0.000206581	0.000162382
ko05204; Chemical carcinogenesis	2.54951e-05	4.72574e-05	2.56353e-05	7.5475e-05	4.5731e-05	4.88356e-05	3.50183e-05	3.24334e-05	3.67598e-05	4.02765e-05	3.72512e-05	3.79682e-05	3.36869e-05	2.90074e-05	3.05371e-05	3.06241e-05	3.17635e-05	3.51356e-05	4.98603e-05	4.31942e-05	5.02425e-05
ko05210; Colorectal cancer	1.18173e-06	2.49047e-06	1.89942e-06	1.18231e-06	1.65532e-06	1.55968e-06	1.62794e-06	2.58748e-06	1.95168e-06	1.47057e-06	1.08183e-06	1.59898e-06	1.79704e-06	1.44936e-06	1.50354e-06	2.46535e-06	2.69807e-06	1.8802e-06	3.66154e-06	3.70572e-07	2.08204e-06
ko05211; Renal cell carcinoma	0.000168115	0.000179222	0.000148275	0.000153814	0.000132853	0.00013797	0.000160817	0.000178108	0.00016309	0.000182384	0.000171992	0.000187529	0.000195925	0.000173419	0.000178892	0.00016158	0.000172026	0.000173327	0.000136752	9.12426e-05	0.000161925
ko05214; Glioma	1.43074e-11	6.37329e-12	0	2.53294e-10	4.60305e-11	4.53829e-11	0	4.83835e-11	0	1.16229e-11	4.44745e-11	0	1.0458e-11	0	1.479e-11	2.88431e-11	0	0	0	2.7591e-11	5.52355e-11
ko05215; Prostate cancer	0.00022982	0.000218414	0.00025813	0.000203226	0.000243474	0.000239961	0.000221454	0.000226536	0.000218473	0.000208967	0.000216316	0.000221254	0.000222948	0.000228544	0.000224112	0.000244057	0.000233865	0.000222521	0.000260401	0.000218832	0.000222683
ko05219; Bladder cancer	4.64853e-05	5.47982e-05	4.54994e-05	8.2241e-05	5.41081e-05	5.3315e-05	5.91561e-05	5.96277e-05	6.24429e-05	5.32061e-05	5.1126e-05	4.47373e-05	5.00484e-05	5.0816e-05	4.80017e-05	4.97669e-05	5.49628e-05	5.08952e-05	5.81094e-05	7.66751e-05	5.34435e-05
ko05220; Chronic myeloid leukemia	1.37494e-05	1.29286e-05	1.09953e-05	7.06166e-06	1.06406e-05	1.13367e-05	1.30963e-05	1.06722e-05	1.30393e-05	1.32818e-05	1.34791e-05	1.33993e-05	1.20016e-05	1.44737e-05	1.49696e-05	1.21187e-05	1.08183e-05	1.14155e-05	7.82753e-06	7.7437e-06	1.30023e-05
ko05222; Small cell lung cancer	6.52476e-06	7.46298e-06	6.72132e-06	5.5105e-06	5.13491e-06	5.27059e-06	6.51244e-06	6.49026e-06	6.80744e-06	7.02675e-06	6.55013e-06	7.34369e-06	6.70601e-06	6.52992e-06	6.93166e-06	8.2862e-06	7.17632e-06	6.18187e-06	7.27428e-06	4.40572e-06	6.87673e-06
ko05322; Systemic lupus erythematosus	7.94598e-05	8.42044e-05	7.22576e-05	5.85087e-05	7.1774e-05	7.91606e-05	0.000114908	5.89444e-05	0.000112979	7.4041e-05	8.10995e-05	7.56792e-05	7.62611e-05	9.20288e-05	8.25931e-05	6.65501e-05	5.2916e-05	5.54443e-05	5.79632e-05	7.96271e-05	0.000105189
ko05340; Primary immunodeficiency	0.000257728	0.000249512	0.000325699	0.000427987	0.000347219	0.000330999	0.000223721	0.000329873	0.000227374	0.00025748	0.000267859	0.000250073	0.00026869	0.000243046	0.000242404	0.000288998	0.000337261	0.000338291	0.000387749	0.000448342	0.000233599
ko05410; Hypertrophic cardiomyopathy (HCM)	9.97899e-06	1.00426e-05	1.44964e-05	1.288e-05	1.27638e-05	1.28158e-05	9.31664e-06	1.07775e-05	8.47252e-06	1.23412e-05	1.15656e-05	1.33991e-05	1.3527e-05	1.02051e-05	1.0557e-05	1.36451e-05	1.31653e-05	1.12869e-05	1.35168e-05	6.14494e-06	9.94693e-06
ko05412; Arrhythmogenic right ventricular cardiomyopathy (ARVC)	6.13599e-10	1.11339e-09	0	1.50518e-08	7.58689e-09	1.0006e-08	7.02724e-11	9.53909e-10	0	1.45069e-10	2.56506e-09	0	5.95237e-10	1.68822e-09	6.5846e-11	1.09444e-09	0	1.69965e-09	1.31309e-10	8.16475e-10	2.33505e-10
ko05414; Dilated cardiomyopathy	6.13599e-10	1.11339e-09	0	1.50518e-08	7.58689e-09	1.0006e-08	7.02724e-11	9.53909e-10	0	1.45069e-10	2.56506e-09	0	5.95237e-10	1.68822e-09	6.5846e-11	1.09444e-09	0	1.69965e-09	1.31309e-10	8.16475e-10	2.33505e-10
ko05416; Viral myocarditis	1.18173e-06	2.49047e-06	1.89942e-06	1.18231e-06	1.65532e-06	1.55968e-06	1.62794e-06	2.58748e-06	1.95168e-06	1.47057e-06	1.08183e-06	1.59898e-06	1.79704e-06	1.44936e-06	1.50354e-06	2.46535e-06	2.69807e-06	1.8802e-06	3.66154e-06	3.70572e-07	2.08204e-06
